# Supplementary material
Source: publisher figshare collection journal article supplement (https://brill.figshare.com/articles/dataset/_/7188803)
Supplement: Supplementary file 1 [file 1]

## Sheet: Research Topic and Organism
Short reference	Year	Subject 1	Subject 2	Use of fossils	Study group 1	Study group 2	Study group 3	Extracted information 1	Extracted information 2	Extracted information 3	Full reference
Abramyan et al. 2014	2014	Anatomy and Development		0	Testudines	Crocodilians	Squamates	Descriptive			Abramyan, J., Leung, K.J.M., Richman, J.M. (2014). Divergent palate morphology in turtles and birds correlates with differences in proliferation and BMP2 expression during embryonic development. J. Exp. Zool. B. Mol. Dev. Evol. 322: 73-85.
Achrai & Wagner 2013	2013	Biomechanics		0	Testudines			Descriptive			Achrai, B., Wagner, H.D. (2013). Micro-structure and mechanical properties of the turtle carapace as a biological composite shield. Acta Biomater. 9: 5890-5902.
Alfonso et al. 2017	2017	Anatomy and Development		0	Anurans			Descriptive			Alfonso, Y.U., Rodríguez-Gómez, Y., Charruau, P., Sanz-Ochotorena, A., Krysko, K.L. (2017). Oviposition and Gonadal Ultrastructure in the Cuban Groin-spot Frog, Eleutherodactylus atkinsi Dunn, 1925 (Anura: Eleutherodactylidae). Copeia 105: 781-790.
Allemand et al. 2017	2017	Anatomy and Development	Ecology and Evolution	0	Squamates			Measurement			Allemand, R., Boistel, R., Daghfous, G., Blanchet, Z., Cornette, R., Bardet, N., Vincent, P., Houssaye, A. (2017). Comparative morphology of snake (Squamata) endocasts: evidence of phylogenetic and ecological signals. J. Anat. 231: 849-868.
Anderson Maisano 2002	2002	Anatomy and Development		0	Squamates			Descriptive			Anderson Maisano, J., Bell, C.J., Gauthier, J.A., Rowe, T. (2002). The osteoderms and palpebral in Lanthanotus borneensis (Squamata: Anguimorpha). J. Herp. 36: 678-682.
Andjelković et al. 2016	2016	Anatomy and Development		0	Squamates			Geometric morphometrics			Andjelković, M., Tomović, L., Ivanović, A. (2016). Variation in skull size and shape of two snake species (Natrix natrix and Natrix tessellata). Zoomorphology 135: 243-253.
Andjelković et al. 2017	2017	Anatomy and Development		0	Squamates			Geometric morphometrics			Andjelković, M., Tomović, L., Ivanović, A. (2017). Morphological integration of the kinetic skull in Natrix snakes. J. Zool. 303: 188-198.
Ascarrunz et al. 2016	2016	Taxonomy and Systematics	Anatomy and Development	1	Anurans			Descriptive			Ascarrunz, E., Rage, J.C., Legreneur, P., Laurin, M. (2016). Triadobatrachus massinoti, the earliest known lissamphibian (Vertebrata: Tetrapoda) re-examined by μCT scan, and the evolution of trunk length in batrachians. Contrib. Zool. 85: 201-234.
Baeckens et al. 2017	2017	Ecology and Evolution		0	Squamates			Measurement			Baeckens, S., Herrel, A., Broeckhoven, C., Vasilopoulou-Kampitsi, M., Huyghe, K., Goyens, J., Van Damme, R. (2017). Evolutionary morphology of the lizard chemosensory system. Sci. Rep. 7: 10141.
Bailon et al. 2014	2014	Taxonomy and Systematics		1	Squamates			Descriptive			Bailon, S., Boistel, R., Bover, P., Alcover, J.A. (2014). Maioricalacerta rafelinensis, gen. et sp. nov.(Squamata, Lacertidae), from the early Pliocene of Mallorca (Balearic Islands, western Mediterranean Sea). J. Vert. Paleontol. 34: 318-326.
Bauer et al. 2018	2018	Anatomy and Development		0	Squamates			Descriptive			Bauer, A.M., Beach-Mehrotra, M., Bermudez, Y., Clark, G.E., Daza, J.D., Glynne, E., Hagyari, D., Harnden, J.M., Holovacs, N., Kanasiro, A., Lofthus, A.J. (2018). The tiny skull of the peruvian gecko Pseudogonatodes barbouri (Gekkota: Sphaerodactylidae) obtained via a divide-and-conquer approach to morphological data acquisition. S. Am. J. Herpetol. 13: 102-116.
Bellati et al. 2018	2018	Taxonomy and Systematics		0	Anurans			Descriptive			Bellati, A., Scherz, M.D., Megson, S., Roberts, S.H., Andreone, F., Rosa, G.M., Noël, J., Randrianirina, J.E., Fasola, M., Glaw, F., Crottini, A. (2018). Resurrection and re-description of Plethodontohyla laevis (Boettger, 1913) and transfer of Rhombophryne alluaudi (Mocquard, 1901) to the genus Plethodontohyla (Amphibia, Microhylidae, Cophylinae). Zoosyst. Evol. 94: 109.
Bergmann & Berk 2012	2012	Anatomy and Development	Ecology and Evolution	0	Squamates			Measurement			Bergmann, P.J., Berk, C.P. (2012). The evolution of positive allometry of weaponry in horned lizards (Phrynosoma). Evol. Biol. 39: 311-323.
Bever et al. 2005	2005	Anatomy and Development		0	Squamates			Descriptive	Measurement		Bever, G.S., Bell, C.J., Maisano, J.A. (2005). The ossified braincase and cephalic osteoderms of Shinisaurus crocodilurus (Squamata, Shinisauridae). Palaeontol. Electron. 8: 1-36.
Bhullar 2011	2011	Taxonomy and Systematics		0	Squamates			Descriptive			Bhullar, B.S. (2011). The power and utility of morphological characters in systematics: a fully resolved phylogeny of Xenosaurus and its fossil relatives (Squamata: Anguimorpha). Bull Mus. Comp. Zool. 160: 65-181.
Blanco et al. 2015	2015	Anatomy and Development	Biomechanics	0	Crocodilians			Measurement	Simulation/Modelling		Blanco, R.E., Jones, W.W., Villamil, J. (2015). The ‘death roll’ of giant fossil crocodyliforms (Crocodylomorpha: Neosuchia). allometric and skull strength analysis. Hist. Biol. 27: 514-524.
Bochaton et al. 2016	2016	Anatomy and Development		1	Squamates			Descriptive			Bochaton, C., Boistel, R., Casagrande, F., Grouard, S., Bailon, S. (2016). A fossil Diploglossus (Squamata, Anguidae) lizard from Basse-Terre and Grande-Terre Islands (Guadeloupe, French West Indies). Sci. Rep. 6: p.28475.
Bochaton et al. 2015	2015	Ecology and Evolution		0	Squamates			Descriptive			Bochaton, C., Boistel, R., Charles, L. (2015). X-ray microtomography provides first data about the feeding behaviour of an endangered lizard, the Montserrat galliwasp (Diploglossus montisserrati). R. Soc. Open Sci. 2: p.150461.
Boistel et al. 2011	2011	Ecology and Evolution		0	Squamates			Measurement	Geometic morphometrics		Boistel, R., Herrel, A., Lebrun, R., Daghfous, G., Tafforeau, P., Losos, J.B., Vanhooydonck, B. (2011). Shake rattle and roll: the bony labyrinth and aerial descent in squamates. Integr. Comp. Biol. 51: 957-968.
Bona et al. 2017	2017	Anatomy and Development		0	Crocodilians			Descriptive			Bona, P., Carabajal, A.P., Gasparini, Z. (2017). Neuroanatomy of Gryposuchus neogaeus (Crocodylia, Gavialoidea). a first integral description of the braincase and endocranial morphological variation in extinct and extant gavialoids. Earth Env. Sci. T. R. So. 106: 235-246.
Bornschein et al. 2016	2016	Taxonomy and Systematics		0	Anurans			Descriptive			Bornschein, M.R., Ribeiro, L.F., Blackburn, D.C., Stanley, E.L., Pie, M.R. (2016). A new species of Brachycephalus (Anura: Brachycephalidae) from Santa Catarina, southern Brazil. PeerJ 4: p.e2629.
Boughner et al. 2007	2007	Anatomy and Development		0	Squamates			Descriptive			Boughner, J.C., Buchtová, M., Fu, K., Diewert, V., Hallgrímsson, B., Richman, J.M. (2007). Embryonic development of Python sebae–I: Staging criteria and macroscopic skeletal morphogenesis of the head and limbs. Zoology 110: 212-230.
Brinkman et al. 2006 2007	2007	Taxonomy and Systematics		1	Testudines			Descriptive			Brinkman, D., Hart, M., Jamniczky, H., Colbert, M. (2006). Nichollsemys baieri gen. et sp. nov, a primitive chelonioid turtle from the late Campanian of North America. Paludicola 5: 111-124.
Broeckhoven et al. 2018	2018	Ecology and Evolution		0	Squamates			Measurement			Broeckhoven, C., de Kock, C., Hui, C. (2018). Sexual dimorphism in the dermal armour of cordyline lizards. Biol. J. Linn. Soc. bly096, https://doi.org/10.1093/biolinnean/bly096
Broeckhoven et al. 2017	2017	Ecology and Evolution	Anatomy and Development	0	Squamates			Measurement			Broeckhoven, C., de Kock, C., Mouton, P.L.F.N. (2017). Sexual dimorphism in osteoderm expression and the role of male intrasexual aggression. Biol, J. Linn. Soc. 122: 329-339.
Broeckhoven et al. 2016	2016	Ecology and Evolution		0	Squamates			Measurement			Broeckhoven, C., Diedericks, G., Hui, C., Makhubo, B.G., Mouton, P.le F.N. (2016). Enemy at the gates: rapid defensive trait diversification in an adaptive radiation of lizards. Evolution 70: 2647-2656.
Broeckhoven & du Plessis 2017	2017	Ecology and Evolution	Biomechanics	0	Squamates			Measurement	Simulation/Modelling		Broeckhoven, C., du Plessis, A. (2017). Has snake fang evolution lost its bite? New insights from a structural mechanics viewpoint. Biol. Lett. 13: p.20170293.
Broeckhoven et al. 2017	2017	Biomechanics		0	Squamates			Simulation/Modelling			Broeckhoven, C., du Plessis, A., Hui, C. (2017). Functional trade-off between strength and thermal capacity of dermal armor: insights from girdled lizards. J. Mech. Behav. Biomed. Mater. 74: 189-194.
Broeckhoven et al. 2018	2018	Ecology and Evolution		0	Squamates			Measurement			Broeckhoven, C., El Adak, Y., Hui, C., Van Damme, R., Stankowich, T. (2018). On dangerous ground: the evolution of body armour in cordyline lizards. Proc. R. Soc. B. 285: 20180513.
Broeckhoven et al. 2018	2018	Ecology and Evolution		0	Squamates			Measurement			Broeckhoven, C., Mouton, P.L.F.N., Hui, C. (2018). Proximate causes of variation in dermal armour: insights from armadillo lizards. Oikos. https://doi.org/10.1111/oik.05401.
Brusatte et al. 2016	2016	Anatomy and Development		0	Crocodilians			Descriptive			Brusatte, S.L., Muir, A., Young, M.T., Walsh, S., Steel, L., Witmer, L.M. (2016). The braincase and neurosensory anatomy of an Early Jurassic marine crocodylomorph: implications for crocodylian sinus evolution and sensory transitions. Anat. Rec. 299: 1511-1530.
Buchtova et al. 2013	2013	Anatomy and Development		0	Squamates			Descriptive			Buchtová, M., Zahradníček, O., Balková, S., Tucker, A.S. (2013). Odontogenesis in the veiled Chameleon (Chamaeleo calyptratus). Arc. Oral Biol. 58: 118-133.
Buckley et al. 2010	2010	Anatomy and Development	Taxonomy and Systematics	0	Urodeles			Descriptive			Buckley, D., Wake, M.H., Wake, D.B. (2010). Comparative skull osteology of Karsenia koreana (Amphibia, Caudata, Plethodontidae). J. Morph. 271: 533-558.
Cadena 2016	2016	Taxonomy and Systematics		1	Testudines			Descriptive			Cadena, E. (2016). Palaeoamyda messeliana nov. comb.(Testudines, Pan-Trionychidae) from the Eocene Messel Pit and Geiseltal localities, Germany, taxonomic and phylogenetic insights. PeerJ 4: p.e2647.
Cadena & Jaramillo 2015	2015	Anatomy and Development		1	Testudines			Descriptive	Measurement		Cadena, E.A., Jaramillo, C.A. (2015). The first fossil skull of Chelus (Pleurodira: Chelidae, Matamata turtle) from the early Miocene of Colombia. Palaeontol. Electron. 18: 1-10.
Caldwell et al. 2015	2015	Taxonomy and Systematics		1	Squamates			Descriptive			Caldwell, M.W., Nydam, R.L., Palci, A., Apesteguía, S. (2015). The oldest known snakes from the Middle Jurassic-Lower Cretaceous provide insights on snake evolution. Nat. Commun. 6: p.5996.
Caut et al. 2013	2013	Taxonomy and Systematics		0	Squamates			Descriptive			Caut, S., Holden, M., Jowers, M.J., Boistel, R., Ineich, I. (2013). Is Bocourt’s terrific skink really so terrific? Trophic myth and reality. PloS one 8: p.e78638.
Čerňanský 2016	2016	Anatomy and Development		0	Squamates			Descriptive	Measurement		Čerňanský, A. (2016). From lizard body form to serpentiform morphology: The atlas–axis complex in African cordyliformes and their relatives. J. Moph. 277: 512-536.
Čerňanský ey al. 2017	2017	Taxonomy and Systematics		1	Squamates			Descriptive			Čerňanský, A., Bolet, A., Müller, J., Rage, J.C., Augé, M., Herrel, A. (2017). A new exceptionally preserved specimen of Dracaenosaurus (Squamata, Lacertidae) from the Oligocene of France as revealed by micro-computed tomography. J. Vert. Paleontol. 37: e1384738.
Čerňanský & Klembara 2017	2017	Taxonomy and Systematics		1	Squamates			Descriptive			Čerňanský, A., Klembara, J. (2017). A skeleton of Ophisaurus (Squamata: Anguidae) from the middle Miocene of Germany, with a revision of the partly articulated postcranial material from Slovakia using micro-computed tomography. J. Vert. Paleontol. 37: e1333515.
Čerňanský & Smith 2017	2017	Taxonomy and Systematics		1	Squamates			Descriptive			Čerňanský, A., Smith, K.T. (2017). Eolacertidae: a new extinct clade of lizards from the Palaeogene; with comments on the origin of the dominant European reptile group–Lacertidae. Hist. Biol. DOI: 10.1080/08912963.2017.1327530.
Chen et al. 2015	2015	Anatomy and Development		0	Testudines			Descriptive			Chen, I.H., Yang, W., Meyers, M.A. (2015). Leatherback sea turtle shell: a tough and flexible biological design. Acta Biomater. 28: 2-12.
Chen et al. 2016	2016	Taxonomy and Systematics		1	Anurans			Descriptive			Chen, J., Bever, G.S., Yi, H.Y., Norell, M.A. (2016). A burrowing frog from the late Paleocene of Mongolia uncovers a deep history of spadefoot toads (Pelobatoidea) in East Asia. Sci. Rep. 6: p.19209.
Chen et al. 2012	2012	Anatomy and Development		0	Anurans			Descriptive			Chen, Y., Lin, G., Chen, Y., Fok, A., Slack, J.M. (2012). Micro‐computed tomography for visualizing limb skeletal regeneration in young xenopus frogs. Anat. Rec. 295: 1562-1565.
Christensen et al. 2012	2012	Anatomy and Development		0	Squamates			Descriptive			Christensen, C.B., Christensen-Dalsgaard, J., Brandt, C., Madsen, P.T. (2012). Hearing with an atympanic ear: good vibration and poor sound-pressure detection in the royal python, Python regius. J. Exp. Biol. 215: 331-342.
Christensen et al. 2015	2015	Anatomy and Development	Ecology and Evolution	0	Urodeles			Descriptive			Christensen, C.B., Lauridsen, H., Christensen-Dalsgaard, J., Pedersen, M., Madsen, P.T. (2015). Better than fish on land? Hearing across metamorphosis in salamanders. Proc. R. Soc. Lond. B. Biol. Sci. 282: p.20141943.
Clarac et al. 2017	2017	Ecology and Evolution		0	Crocodilians			Measurement			Clarac, F., De Buffrénil, V., Brochu, C., Cubo, J. (2017). The evolution of bone ornamentation in Pseudosuchia: morphological constraints versus ecological adaptation. Biol. J. Linn. Soc. 121: 395-408.
Clarac et al. 2016	2016	Anatomy and Development	Ecology and Evolution	0	Crocodilians			Geometric morphometrics			Clarac, F., Souter, T., Cubo, J., Buffrénil, V., Brochu, C., Cornette, R. (2016). Does skull morphology constrain bone ornamentation? A morphometric analysis in the Crocodylia. J. Anat. 229: 292-301.
Comanns et al. 2017	2017	Ecology and Evolution		0	Squamates			Measurement			Comanns, P., Esser, F.J., Kappel, P.H., Baumgartner, W., Shaw, J., Withers, P.C. (2017). Adsorption and movement of water by skin of the Australian thorny devil (Agamidae: Moloch horridus). R. Soc. Open Sci. 4: 170591.
Conrad & Daza 2015	2015	Taxonomy and Systematics		1	Squamates			Descriptive			Conrad, J.L., Daza, J.D. (2015). Naming and rediagnosing the Cretaceous gekkonomorph (Reptilia, Squamata) from Öösh (Övörkhangai, Mongolia). J. Vert. Paleontol. 35: p.e980891.
Conrad & Norell 2006	2006	Anatomy and Development	Taxonomy and Systematics	1	Squamates			Descriptive			Conrad, J.L., Norell, M.A. (2006). High-resolution x-ray computed tomography of an Early Cretaceous gekkonomorph (Squamata) from Öösh (Övörkhangai; Mongolia). Hist. Biol. 18: 405-431.
Costantini et al. 2010	2010	Anatomy and Development		0	Squamates			Geometric morphometrics	Measurmement		Costantini, D., Alonso, M.L., Moazen, M., Bruner, E. (2010). The relationship between cephalic scales and bones in lizards: a preliminary microtomographic survey on three lacertid species. Anat. Rec. 293: 183-194.
Cundall et al. 2017	2017	Anatomy and Development		0	Anurans			Descriptive			Cundall, D., Fernandez, E., Irish, F. (2017). The suction mechanism of the pipid frog, Pipa pipa (Linnaeus, 1758). J. Morph. 278: 1229-1240.
Curtis et al. 2009	2009	Biomechanics		0	Rhynchocephalians			Simulation/Modelling			Curtis, N., Fagan, M.J., Jones, M.E.H., Evans, S.E., O'Higgins, P. (2009). Visualising muscle anatomy using three-dimensional computer models-an example using the head and neck muscles of Sphenodon. Palaeontol. Electron. 12: 7T.
Curtis et al. 2010	2010	Biomechanics		0	Rhynchocephalians			Simulation/Modelling			Curtis, N., Jones, M.E., Evans, S.E., Shi, J., O'Higgins, P., Fagan, M.J. (2010). Predicting muscle activation patterns from motion and anatomy: modelling the skull of Sphenodon (Diapsida: Rhynchocephalia). J. R. Soc. Interface 7: 153-160.
Curtis et al. 2010	2010	Biomechanics		0	Rhynchocephalians			Simulation/Modelling			Curtis, N., Jones, M.E., Lappin, A.K., O’Higgins, P., Evans, S.E., Fagan, M.J. (2010). Comparison between in vivo and theoretical bite performance: using multi-body modelling to predict muscle and bite forces in a reptile skull. J. Biomech. 43: 2804-2809.
Curtis et al. 2011	2011	Biomechanics		0	Rhynchocephalians			Simulation/Modelling			Curtis, N., Jones, M.E., Shi, J., O'Higgins, P., Evans, S.E., Fagan, M.J. (2011). Functional relationship between skull form and feeding mechanics in Sphenodon, and implications for diapsid skull development. PLOS one 6: p.e29804.
Curtis et al. 2013	2013	Biomechanics		0	Rhynchocephalians			Simulation/Modelling			Curtis, N., Jones, M.E.H., Evans, S.E., O'higgins, P., Fagan, M.J. (2013). Cranial sutures work collectively to distribute strain throughout the reptile skull. J. R. Soc. Interface 10: 20130442.
Da Silva et al. 2018	2018	Ecology and Evolution		0	Squamates	Rhynchocephalians		Geometric morphometrics			Da Silva, F.O., Fabre, A.C., Savriama, Y., Ollonen, J., Mahlow, K., Herrel, A., Müller, J., Di-Poï, N. (2018). The ecological origins of snakes as revealed by skull evolution. Nat. Commun. 9: 376.
Daza et al. 2012	2012	Taxonomy and Systematics		0	Squamates			Descriptive			Daza, J.D., Abdala, V., Arias, J.S., García-López, D., Ortiz, P. (2012). Cladistic analysis of Iguania and a fossil lizard from the late Pliocene of northwestern Argentina. J. Herpetol. 46: 104-119.
Daza et al. 2012	2012	Anatomy and Development		0	Squamates			Descriptive			Daza, J.D., Aurich, J., Bauer, A.M. (2012). Anatomy of an enigma: an osteological investigation of the Namibian festive gecko (Narudasia festiva: Gekkonidae: Gekkota). Acta Zool. 93: 465-486.
Daza & Bauer 2010	2010	Taxonomy and Systematics		1	Squamates			Descriptive			Daza, J.D., Bauer, A.M. (2012). A new amber-embedded sphaerodactyl gecko from Hispaniola, with comments on morphological synapomorphies of the Sphaerodactylidae. Breviora 529: 1-28.
Daza & Bauer 2012	2012	Anatomy and Development		0	Squamates			Descriptive			Daza, J.D., Bauer, A.M. (2012). Temporal bones of the Gekkota support molecular relationships within the Pygopodoidea. J. Herp. 46: 381-386.
Daza et al. 2015	2015	Anatomy and Development		1	Squamates			Descriptive			Daza, J.D., Bauer, A.M., Sand, C., Lilley, I., Wake, T.A., Valentin, F. (2015). Reptile Remains from Tiga (Tokanod), Loyalty Islands, New Caledonia. Pac. Sci. 69: 531-557.
Daza et al. 2013	2013	Taxonomy and Systematics		1	Squamates			Descriptive			Daza, J.D., Bauer, A.M., Snively, E. (2013). Gobekko cretacicus (Reptilia: Squamata) and its bearing on the interpretation of gekkotan affinities. Zool. J. Linn. Soc. 167: 430-448.
Daza et al. 2014	2014	Taxonomy and Systematics		1	Squamates			Descriptive			Daza, J.D., Bauer, A.M., Snively, E.D. (2014). On the fossil record of the Gekkota. Anat. Rec. 297: 433-462.
Daza et al. 2017	2017	Anatomy and Development	Taxonomy and Systematics	0	Squamates			Descriptive			Daza, J.D., Gamble, T., Abdala, V., Bauer, A.M. (2017). Cool Geckos: Does Plesiomorphy Explain Morphological Similarities between Geckos from the Southern Cone?. J. Herp. 51: 330-342.
Daza et al. 2015	2015	Anatomy and Development		0	Squamates			Descriptive			Daza, J.D., Mapps, A.A., Lewis, P.J., Thies, M.L., Bauer, A.M. (2015). Peramorphic traits in the tokay gecko skull. J. Morph. 276: 915-928.
del Rosario Castañeda et al. 2014	2014	Taxonomy and Systematics		1	Squamates			Descriptive			del Rosario Castañeda, M., Sherratt, E., Losos, J.B. (2014). The Mexican amber anole, Anolis electrum, within a phylogenetic context: implications for the origins of Caribbean anoles Zool. J. Linn. Soc. 172: 133-144.
DeMar et al. 2017	2017	Taxonomy and Systematics		1	Squamates			Descriptive			DeMar, D.G., Conrad, J.L., Head, J.J., Varricchio, D.J., Wilson, G.P. (2017). A new Late Cretaceous iguanomorph from North America and the origin of New World Pleurodonta (Squamata, Iguania). Proc. R. Soc. B. 284: 20161902.
Dollion et al. 2015	2015	Taxonomy and Systematics		1	Squamates			Geometric morphometrics			Dollion, A.Y., Cornette, R., Tolley, K.A., Boistel, R., Euriat, A., Boller, E., Fernandez, V., Stynder, D., Herrel, A. (2015). Morphometric analysis of chameleon fossil fragments from the Early Pliocene of South Africa: a new piece of the chamaeleonid history. Sci. Nat. 102: 2.
Dollion et al. 2017	2017	Ecology and Evolution		0	Squamates			Geometric morphometrics			Dollion, A.Y., Measey, G.J., Cornette, R., Carne, L., Tolley, K.A., Silva, J.M., Boistel, R., Fabre, A.C., Herrel, A. (2017). Does diet drive the evolution of head shape and bite force in chameleons of the genus Bradypodion?. Funct. Ecol. 31: 671-684.
Dong et al. 2018	2018	Taxonomy and Systematics		1	Squamates			Descriptive			Dong, L., Xu, X., Wang, Y., Evans, S.E. (2018). The lizard genera Bainguis and Parmeosaurus from the Upper Cretaceous of China and Mongolia. Cretaceous Res. 85: 95-108.
Dong et al. 2016	2016	Taxonomy and Systematics		1	Squamates			Descriptive			Dong, L.P., Evans, S.E., Wang, Y. (2016). Taxonomic revision of lizards from the Paleocene deposits of the Qianshan Basin, Anhui, China. Vertebrat. PalAsiatic. 54: 243-268.
Dosedělová et al. 2016	2016	Anatomy and Development		0	Squamates			Descriptive			Dosedělová, H., Štěpánková, K., Zikmund, T., Lesot, H., Kaiser, J., Novotný, K., Štembírek, J., Knotek, Z., Zahradníček, O., Buchtová, M. (2016). Age‐related changes in the tooth–bone interface area of acrodont dentition in the chameleon. J. Anat. 229: 356-368.
Dufeau & Witmer 2015	2015	Anatomy and Development		0	Crocodilians			Measurement			Dufeau, D.L., Witmer, L.M. (2015). Ontogeny of the middle-ear air-sinus system in Alligator mississippiensis (Archosauria: Crocodylia). PloS one 10: p.e0137060.
Evans et al. 2014	2014	Taxonomy and Systematics		1	Anurans			Descriptive			Evans, S.E., Groenke, J.R., Jones, M.E., Turner, A.H., Krause, D.W. (2014). New material of Beelzebufo, a hyperossified frog (Amphibia: Anura) from the Late Cretaceous of Madagascar. PLoS one 9: p.e87236.
Evans et al. 2005	2005	Taxonomy and Systematics		1	Urodeles			Descriptive			Evans, S.E., Lally, C., Chure, D.C., Elder, A., Maisano, J.A., 2005. A Late Jurassic salamander (Amphibia: Caudata) from the Morrison Formation of North America. Zool. J. Linn. Soc. 143: 599-616.
Evans et al. 2006	2006	Taxonomy and Systematics		1	Squamates			Descriptive			Evans, S.E., Manabe, M., Noro, M., Isaji, S. and Yamaguchi, M., 2006. A long‐bodied lizard from the lower cretaceous of japan. Palaeontology 49: 1143-1165.
Evans & Matsumoto 2015	2015	Taxonomy and Systematics		1	Squamates			Descriptive			Evans, S.E., Matsumoto, R. (2015). An assemblage of lizards from the Early Cretaceous of Japan. Palaeontol. Electron. 18: 1-36.
Fernandez et al. 2015	2015	Anatomy and Development		1	Squamates			Descriptive			Fernandez, V., Buffetaut, E., Suteethorn, V., Rage, J.C., Tafforeau, P., Kundrát, M. (2015). Evidence of egg diversity in squamate evolution from Cretaceous anguimorph embryos. PloS one 10: p.e0128610.
Ferreira et al. 2018	2018	Taxonomy and Systematics		1	Testudines			Descriptive	Measurements		Ferreira, G.S., Iori, F.V., Hermanson, G., Langer, M.C. (2018). New turtle remains from the Late Cretaceous of Monte Alto-SP, Brazil, including cranial osteology, neuroanatomy and phylogenetic position of a new taxon. PalZ. 1-18.
Poinar Jr. et al. 2017	2017	Anatomy and Development		1	Squamates			Descriptive			Fontanarrosa, G., Daza, J.D., Abdala, V. (2018). Cretaceous fossil gecko hand reveals a strikingly modern scansorial morphology: Qualitative and biometric analysis of an amber-preserved lizard hand. Cretaceous Res. 84: 120-133.
Fortuny et al. 2016	2016	Biomechanics		1	Urodeles	Crocodilians		Simulation/Modelling			Fortuny, J., Marcé-Nogué, J., Steyer, J.S., de Esteban-Trivigno, S., Mujal, E., Gil, L. (2016). Comparative 3D analyses and palaeoecology of giant early amphibians (Temnospondyli: Stereospondyli). Sci. Rep. 6: p.30387.
Frýdlová et al. 2017	2017	Anatomy and Development	Ecology and Evolution	0	Squamates			Descriptive			Frýdlová, P., Nutilová, V., Dudák, J., Žemlička, J., Němec, P., Velenský, P., Jirásek, T., Frynta, D. (2017). Patterns of growth in monitor lizards (Varanidae) as revealed by computed tomography of femoral growth plates. Zoomorphology 136: 95-106.
Galiová et al. 2010	2010	Anatomy and Development		1	Squamates			Descriptive			Galiová, M., Kaiser, J., Novotný, K., Ivanov, M., Fišáková, M.N., Mancini, L., Tromba, G., Vaculovič, T., Liška, M., Kanický, V. (2010). Investigation of the osteitis deformans phases in snake vertebrae by double-pulse laser-induced breakdown spectroscopy. Anal. Bioanal. Chem. 398: 1095-1107.
Gauthier et al. 2012	2012	Taxonomy and Systematics		1	Squamates			Descriptive			Gauthier, J.A., Kearney, M., Maisano, J.A., Rieppel, O., Behlke, A.D. (2012). Assembling the squamate tree of life: perspectives from the phenotype and the fossil record. B. Peabody Mus. Nat. Hist. 53: 3-308.
Gold et al. 2014	2014	Taxonomy and Systematics		0	Crocodilians			Geometric morphometrics			Gold, M.E.L., Brochu, C.A., Norell, M.A. (2014). An expanded combined evidence approach to the Gavialis problem using geometric morphometric data from crocodylian braincases and Eustachian systems. PloS one 9: p.e105793.
Goutte et al. 2017	2017	Anatomy and Development		0	Anurans			Descriptive			Goutte, S., Mason, M.J., Christensen-Dalsgaard, J., Montealegre-z, F., Chivers, B.D., Sarria-s, F.A., Antoniazzi, M.M., Jared, C., Sato, L.A., Toledo, L.F. (2017). Evidence of auditory insensitivity to vocalization frequencies in two frogs. Sci. Rep. 7: p.12121.
Gower et al. 2016	2016	Taxonomy and Systematics		0	Squamates			Descriptive			Gower, D.J., Wade, E.O., Spawls, S., Böhme, W., Buechley, E.R., Sykes, D., Colston, T.J. (2016). A new large species of Bitis Gray, 1842 (Serpentes: Viperidae) from the Bale Mountains of Ethiopia. Zootaxa 4093: 41-63.
Gower et al. 2010	2010	Taxonomy and Systematics		0	Caecilians			Descriptive	Measurement		Gower, D.J., Wilkinson, M., Sherratt, E., Kok, P.J. (2010). A new species of Rhinatrema Duméril & Bibron (Amphibia: Gymnophiona: Rhinatrematidae) from Guyana. Zootaxa 2391: 47-60.
Greenbaum et al. 2012	2012	Taxonomy and Systematics		0	Squamates			Descriptive			Greenbaum, E., Stanley, E.L., Kusamba, C., Moninga, W.M., Goldberg, S.R., Bursey, C.R. (2012). A new species of Cordylus (Squamata: Cordylidae) from the Marungu Plateau of south-eastern Democratic Republic of the Congo. Afr. J. Herp. 61: 14-39.
Grieco & Richman 2018	2018	Anatomy and Development		0	Squamates			Descriptive			Grieco, T.M., Richman, J.M. (2018). Coordination of bilateral tooth replacement in the juvenile gecko is continuous with in ovo patterning. Evol. Develop. 20: 51-64.
Grimaldi et al. 1999	1999	Anatomy and Development		0	Crocodilians			Descriptive			Grimaldi, D., Nguyen, T., Ketcham, R. (2000) Ultra-high-resolution X-ray computed tomography (UHR CT) and the study of fossils in amber. In Studies on Fossils in Amber, with Particular Reference to the Cretaceous of New Jersey, ed. DA Grimaldi, pp. 77–91. Leiden: Backhuys Publ
Gröning et al. 2013	2013	Biomechanics		0	Squamates			Simulation/Modelling			Gröning, F., Jones, M.E., Curtis, N., Herrel, A., O'Higgins, P., Evans, S.E., Fagan, M.J. (2013). The importance of accurate muscle modelling for biomechanical analyses: a case study with a lizard skull. J. R. Soc. Interface 10: 20130216.
Haas et al. 2014	2014	Anatomy and Development		0	Anurans			Descriptive			Haas, A., Pohlmeyer, J., McLeod, D. S., Kleinteich, T., Hertwig, S. T., Das, I., Buchholz, D. R. (2014). Extreme tadpoles II: the highly derived larval anatomy of Occidozyga baluensis (Boulenger, 1896), an obligate carnivorous tadpole. Zoomorphology 133: 321-342.
Handrigan & Richman 2010	2010	Anatomy and Development		0	Squamates			Descriptive			Handrigan, G.R., Richman, J.M. (2010). Autocrine and paracrine Shh signaling are necessary for tooth morphogenesis, but not tooth replacement in snakes and lizards (Squamata). Dev. Biol. 337: 171-186.
Hawlitschek et al. 2016	2016	Taxonomy and Systematics		0	Squamates			Descriptive			Hawlitschek, O., Scherz, M.D., Straube, N., Glaw, F. (2016). Resurrection of the Comoran fish scale gecko Geckolepis humbloti Vaillant, 1887 reveals a disjunct distribution caused by natural overseas dispersal. Org. Divers. Evol. 16: 289-298.
Hawlitschek et al. 2018	2018	Taxonomy and Systematics		0	Squamates			Descriptive			Hawlitschek, O., Scherz, M.D., Ruthensteiner, B., Crottini, A., Glaw, F. (2018) Computational molecular species delimitation and taxonomic revision of the gecko genus Ebenavia Boettger, 1878. Sci. Nat. 105:49.
Heinicke et al. 2015	2015	Taxonomy and Systematics		0	Anurans			Descriptive			Heinicke, M.P., Barrio-Amoros, C.L., Hedges, S.B. (2015). Molecular and morphological data support recognition of a new genus of New World direct-developing frog (Anura: Terrarana) from an under-sampled region of South America. Zootaxa 3986: 151-172.
Heinicke et al. 2009	2009	Taxonomy and Systematics		0	Anurans			Measurement			Heinicke, M.P., Duellman, W.E., Trueb, L., Means, D.B., MacCulloch, R.D., Hedges, S.B. (2009). A new frog family (Anura: Terrarana) from South America and an expanded direct-developing clade revealed by molecular phylogeny. Zootaxa 2211: 1-35.
Heiss et al. 2016	2016	Anatomy and Development		0	Urodeles			Descriptive	Measurement		Heiss, E., Handschuh, S., Aerts, P., Van Wassenbergh, S. (2016). Musculoskeletal architecture of the prey capture apparatus in salamandrid newts with multiphasic lifestyle: does anatomy change during the seasonal habitat switches?. J. Anat. 228: 757-770.
Heiss et al. 2017	2017	Anatomy and Development	Ecology and Evolution	0	Urodeles			Descriptive			Heiss, E., Handschuh, S., Aerts, P., Van Wassenbergh, S. (2017). A tongue for all seasons: extreme phenotypic flexibility in salamandrid newts. Sci. Rep. 7: p.1006.
Herrel et al. 2013	2013	Anatomy and Development	Ecology and Evolution	0	Squamates			Measurement			Herrel, A., Tolley, K.A., Measey, G.J., da Silva, J.M., Potgieter, D.F., Boller, E., Boistel, R., Vanhooydonck, B. (2013). Slow but tenacious: an analysis of running and gripping performance in chameleons. J. Exp. Biol. 216: 1025-1030.
Holliday et al. 2010	2010	Anatomy and Development	Ecology and Evolution	0	Squamates			Decriptive			Holliday, C.M., Gardner, N.M., Paesani, S.M., Douthitt, M., Ratliff, J.L. (2010). Microanatomy of the mandibular symphysis in lizards: patterns in fiber orientation and Meckel's cartilage and their significance in cranial evolution. Anat. Rec. 293: 1350-1359.
Holliday et al. 2013	2013	Anatomy and Development		0	Crocodilians			Descriptive			Holliday, C.M., Tsai, H.P., Skiljan, R.J., George, I.D., Pathan, S. (2013). A 3D interactive model and atlas of the jaw musculature of Alligator mississippiensis. PLoS one 8: p.e62806.
Holmes et al. 2010	2010	Taxonomy and Systematics		1	Squamates			Descriptive			Holmes, R.B., Murray, A.M., Chatrath, P., Attia, Y.S., Simons, E.L. (2010). Agamid lizard (Agamidae: Uromastycinae) from the lower Oligocene of Egypt. Hist. Biol. 22: 215-223.
Houssaye et al. 2013	2013	Ecology and Evolution		0	Squamates			Measurement			Houssaye, A., Boistel, R., Böhme, W., Herrel, A. (2013). Jack-of-all-trades master of all? Snake vertebrae have a generalist inner organization. Naturwissenschaften 100: 997-1006.
Houssaye et al. 2010	2010	Anatomy and Development		0	Squamates			Measurement			Houssaye, A., Mazurier, A., Herrel, A., Volpato, V., Tafforeau, P., Boistel, R., De Buffrénil, V. (2010). Vertebral microanatomy in squamates: structure, growth and ecological correlates. J. Anat. 217: 715-727.
Ivanovic et al. 2013	2013	Ecology and Evolution		0	Urodeles			Geometric morphometrics			Ivanovic, A., Aljancic, G., Arntzen, J.W. (2013). Skull shape differentiation of black and white olms (Proteus anguinus anguinus and Proteus a. parkelj) an exploratory analysis with micro-CT scanning. Contributions Zool. 82: 107-114.
Ivanovic & Arntzen 2018	2018	Ecology and Evolution		0	Urodeles			Geometric morphometrics			Ivanović, A., Arntzen, J.W. (2018). Evolution of skull shape in the family Salamandridae (Amphibia: Caudata). J. Anat. 232: 359-370.
Jayne et al. 2018	2018	Ecology and Evolution		0	Squamates			Descriptive			Jayne, B.C., Voris, H.K., Ng, P.K. (2018). How big is too big? Using crustacean-eating snakes (Homalopsidae) to test how anatomy and behaviour affect prey size and feeding performance. Biol. J. Linn. Soc. 123: 636-650.
Johnston 2010	2010	Anatomy and Development		0	Rhynchocephalians			Descriptive			Johnston, P. (2010). The constrictor dorsalis musculature and basipterygoid articulation in Sphenodon. J. Morph. 271: 280-292.
Jonasson et al. 2012	2012	Anatomy and Development		0	Squamates			Descriptive			Jonasson, K.A., Russell, A.P., Vickaryous, M.K. (2012). Histology and histochemistry of the gekkotan notochord and their bearing on the development of notochordal cartilage. J. Morph. 273: 596-603.
Jones et al. 2013	2013	Taxonomy and Systematics		1	Squamates			Descriptive			Jones, M.E., Anderson, C.L., Hipsley, C.A., Müller, J., Evans, S.E., Schoch, R.R. (2013). Integration of molecules and new fossils supports a Triassic origin for Lepidosauria (lizards, snakes, and tuatara). BMC Evol. Biol. 13: 208.
Jones et al. 2017	2017	Biomechanics		0	Squamates			Simulation/Modelling			Jones, M.E., Gröning, F., Dutel, H., Sharp, A., Fagan, M.J., Evans, S.E. (2017). The biomechanical role of the chondrocranium and sutures in a lizard cranium. J. R. Soc. Interface 14: 20170637.
Jones et al. 2018	2018	Anatomy and Development		1	Rhynchocephalians			Measurement			Jones, M.E., Lucas, P.W., Tucker, A.S., Watson, A.P., Sertich, J.J., Foster, J.R., Williams, R., Garbe, U., Bevitt, J.J., Salvemini, F. (2018). Neutron scanning reveals unexpected complexity in the enamel thickness of an herbivorous Jurassic reptile. J. R. Soc. Interface 15: 20180039.
Jones et al. 2012	2012	Biomechanics		0	Rhynchocephalians			Simulation/Modelling			Jones, M.E., O'higgins, P., Fagan, M.J., Evans, S.E., Curtis, N. (2012). Shearing mechanics and the influence of a flexible symphysis during oral food processing in Sphenodon (Lepidosauria: Rhynchocephalia). Anat. Rec. 295: 1075-1091.
Jones et al. 2012	2012	Anatomy and Development		0	Testudines			Descriptive			Jones, M.E., Werneburg, I., Curtis, N., Penrose, R., O’Higgins, P., Fagan, M.J., Evans, S.E. (2012). The head and neck anatomy of sea turtles (Cryptodira: Chelonioidea) and skull shape in Testudines. PloS one 7: e47852.
Jones et al. 2009	2009	Anatomy and Development		0	Rhynchocephalians			Descriptive			Jones, M.E.H., Curtis, N., O'Higgins, P., Fagan, M.J., Evans, S.E. (2009). The head and neck muscles associated with feeding in Sphenodon (Reptilia: Lepidosauria: Rhynchocephalia). Palaeontol. Electron. 12: 12.2.7A.
Kazi et al. 2018	2018	Ecology and Evolution		0	Squamates			Geometric morphometrics			Kazi, S., Hipsley, C.A. (2018). Conserved evolution of skull shape in Caribbean head-first burrowing worm lizards (Squamata: Amphisbaenia). Biol. J. Linn. Soc. bly086, https://doi.org/10.1093/biolinnean/bly086
Kearney et al. 2005	2005	Anatomy and Development		1	Squamates			Descriptive			Kearney, M., Maisano, J.A., Rowe, T. (2005). Cranial anatomy of the extinct amphisbaenian Rhineura hatcherii (Squamata, Amphisbaenia) based on high‐resolution X‐ray computed tomography. J. Morph. 264: 1-33.
Klages et al. 2013	2013	Taxonomy and Systematics		0	Anurans			Descriptive			Klages JO, Glaw FR, Köhler JÖ, Müller JO, Hipsley CA, Vences M. (2013). Molecular, morphological and osteological differentiation of a new species of microhylid frog of the genus Stumpffia from northwestern Madagascar. Zootaxa 3717: 280-300.
Kleinteich & Gorb 2015	2015	Anatomy and Development	Ecology and Evolution	0	Anurans			Descriptive			Kleinteich, T., Gorb, S.N. (2015). Frog tongue acts as muscle-powered adhesive tape. R. Soc. Open Sci. 2: p.150333.
Kleinteich & Gorb 2016	2016	Anatomy and Development		0	Anurans			Descriptive			Kleinteich, T., Gorb, S.N. (2016). Frog tongue surface microstructures: functional and evolutionary patterns. Beilstein journal of nanotechnology, 7, 893-903
Kleinteich & Gorb 2017	2017	Anatomy and Development		0	Anurans			Descriptive			Kleinteich, T., Gorb, S.N. (2017). Comparative study of tongue surface microstructure and its possible functional significance in frogs. In Functional Surfaces in Biology III (pp. 205-220). Springer, Cham.
Kleinteich et al. 2008	2008	Biomechanics		0	Caecilians			Simulation/Modelling			Kleinteich, T., Haas, A., Summers, A.P. (2008). Caecilian jaw-closing mechanics: integrating two muscle systems. J. R. Soc. Interface 5: 1491-1504.
Klembara et al. 2016	2016	Anatomy and Development		0	Squamates			Descriptive			Klembara, J., Dobiašová, K., Hain, M., Yaryhin, O. (2017). Skull anatomy and ontogeny of legless lizard Pseudopus apodus (Pallas, 1775). heterochronic influences on form. Anat. Rec. 300: 460-502.
Klenner et al. 2016	2016	Anatomy and Development	Biomechanics	0	Crocodilians			Simulation/Modelling			Klenner, S., Witzel, U., Paris, F., Distler, C. (2016). Structure and function of the septum nasi and the underlying tension chord in crocodylians. J. Anat. 228: 113-124.
Kley 2006	2006	Anatomy and Development		0	Squamates			Descriptive			Kley, N.J. (2006). Morphology of the lower jaw and suspensorium in the Texas blindsnake, Leptotyphlops dulcis (Scolecophidia: Leptotyphlopidae). J. Morph. 267: 494-515.
Krings et al. 2017	2017	Anatomy and Development		0	Anurans			Measurement	Descriptive		Krings, M., Klein, B., Heneka, M. J., Rödder, D. (2017). Morphological comparison of five species of poison dart frogs of the genus Ranitomeya (Anura: Dendrobatidae) including the skeleton, the muscle system and inner organs. PloS one 12: e0171669.
Koch & Venegas 2016	2016	Taxonomy and Systematics		0	Squamates			Descriptive			Koch, C., Venegas, P.J. (2016). A large and unusually colored new snake species of the genus Tantilla (Squamata; Colubridae) from the Peruvian Andes. PeerJ 4: p.e2767.
Kucharzewski et al. 2014	2014	Taxonomy and Systematics		0	Squamates			Descriptive			Kucharzewski, C., Raselimanana, A.P., Wang, C., Glaw, F. (2014). A taxonomic mystery for more than 150 years: Identity, systematic position and Malagasy origin of the snake Elapotinus picteti Jan, 1862, and synonymy of Exallodontophis Cadle, 1999 (Serpentes: Lamprophiidae). Zootaxa 3852: 179-202.
Kuehnel et al. 2012	2012	Anatomy and Development		0	Caecilians			Descriptive			Kuehnel, S., Herzen, J., Kleinteich, T., Beckmann, F., Kupfer, A. (2012). The female cloaca of an oviparous caecilian amphibian (Gymnophiona). functional and seasonal aspects. Acta Zool. 9: 208-221.
Kumar et al. 2012	2012	Taxonomy and Systematics		0	Squamates			Descriptive			Kumar, A.B., Sanders, K.L., George, S., Murphy, J.C. (2012). The status of Eurostus dussumierii and Hypsirhina chinensis (Reptilia, Squamata, Serpentes). with comments on the origin of salt tolerance in homalopsid snakes. Syst. Biodiv. 10: 479-489.
Kurosaka et al. 2008	2008	Anatomy and Development		0	Anurans	Urodeles		Descriptive			Kurosaka, H., Takano‐Yamamoto, T., Yamashiro, T., Agata, K. (2008). Comparison of molecular and cellular events during lower jaw regeneration of newt (Cynops pyrrhogaster) and West African clawed frog (Xenopus tropicalis). Dev. Dyn. 237: 354-365.
Laduke et al. 2010	2010	Anatomy and Development		1	Squamates			Descriptive			Laduke, T.C., Krause, D.W., Scanlon, J.D., Kley, N.J. (2010). A Late Cretaceous (Maastrichtian) snake assemblage from the Maevarano Formation, Mahajanga Basin, Madagascar. J. Vert. Paleontol. 30: 109-138.
Lambert et al. 2017	2017	Taxonomy and Systematics		0	Anurans			Descriptive			Lambert, S.M., Hutter, C.R., Scherz, M.D. (2017). Diamond in the rough: a new species of fossorial diamond frog (Rhombophryne) from Ranomafana National Park, southeastern Madagascar. Zoosyst. Evol. 93: 143.
Lauridsen et al. 2014	2014	Anatomy and Development		0	Squamates			Measurement			Lauridsen, H., Da Silva, M.A.O., Hansen, K., Jensen, H.M., Warming, M., Wang, T., Pedersen, M. (2014). Ultrasound imaging of the anterior section of the eye of five different snake species. BMC Vet. Res. 10: 313.
Le et al. 2015	2015	Taxonomy and Systematics		0	Urodeles			Descriptive	Measurmement		Le, D.T., Nguyen, T.T., Nishikawa, K., Nguyen, S.L.H., Pham, A.V., Matsui, M., Bernardes, M., Nguyen, T.Q. (2015). A new species of Tylototriton Anderson, 1871 (Amphibia: Salamandridae) from northern Indochina. Curr. Herpetol. 34: 38-50.
Lintner et al. 2012	2012	Anatomy and Development		0	Testudines			Descriptive			Lintner, M., Weissenbacher, A., Heiss, E. (2012). The oropharyngeal morphology in the semiaquatic giant Asian pond turtle, Heosemys grandis, and its evolutionary implications. PloS one 7: p.e46344.
Lipka et al. 2006 2006	2006	Taxonomy and Systematics		1	Testudines			Descriptive			Lipka, T.R., Therrien, F., Weishampel, D.B., Jamniczky, H.A., Joyce, W.G., Colbert, M.W., Brinkman, D.B. (2006). A new turtle from the Arundel Clay facies (Potomac Formation, Early Cretaceous) of Maryland, USA. J. Vert. Paleontol. 26: 300-307.
Liu et al. 2016	2016	Anatomy and Development	Ecology and Evolution	1	Squamates	Crocodilians		Descriptive			Liu, M., Reed, D.A., Cecchini, G.M., Lu, X., Ganjawalla, K., Gonzales, C.S., Monahan, R., Luan, X., Diekwisch, T.G. (2016). Varanoid tooth eruption and implantation modes in a late cretaceous mosasaur. Front. Physiol. 7: 145.
Lukanov et al. 2016	2016	Anatomy and Development	Ecology and Evolution	0	Urodeles			Descriptive			Lukanov, S., Tzankov, N., Handschuh, S., Heiss, E., Naumov, B., Natchev, N. (2016). On the amphibious food uptake and prey manipulation behavior in the Balkan-Anatolian crested newt (Triturus ivanbureschi, Arntzen and Wielstra, 2013). Zoology 119: 224-231.
Maddin & Anderson 2012	2012	Anatomy and Development	Ecology and Evolution	0	Caecilians			Descriptive			Maddin, H.C., Anderson, J.S. (2012). Evolution of the amphibian ear with implications for lissamphibian phylogeny: insight gained from the caecilian inner ear. Fieldiana Life Earth Sci. 5: 59-76.
Maddin et al. 2012	2012	Taxonomy and Systematics		1	Caecilians			Descriptive			Maddin, H.C., Jenkins Jr, F.A., Anderson, J.S. (2012). The braincase of Eocaecilia micropodia (Lissamphibia, Gymnophiona) and the origin of caecilians. PLoS one 7: p.e50743.
Maddin et al. 2012	2012	Anatomy and Development	Taxonomy and Systematics	0	Caecilians			Measurement			Maddin, H.C., Russell, A.P., Anderson, J.S. (2012). Phylogenetic implications of the morphology of the braincase of caecilian amphibians (Gymnophiona). Zool. J. Linnean Soc. 166: 160-201.
Mahler & Kearney 2006	2006	Anatomy and Development		0	Squamates			Descriptive			Mahler, D.L., Kearney, M. (2006). The palatal dentition in squamate reptiles: morphology, development, attachment, and replacement. Fieldiana Zool. 108: 1-61.
Anderson Maisano et al. 2006	2006	Anatomy and Development		1	Squamates			Descriptive			Maisano, J.A., Kearney, M., Rowe, T. (2006). Cranial anatomy of the spade‐headed amphisbaenian Diplometopon zarudnyi (Squamata, amphisbaenia) based on high‐resolution X‐ray computed tomography. J. Morph. 267: 70-102.
Anderson Maisano & Rieppel 2007	2007	Anatomy and Development		0	Squamates			Descriptive			Maisano, J.A., Rieppel, O. (2007). The skull of the round Island boa, Casarea dussumieri Schlegel, based on high‐resolution X‐ray computed tomography. J. Morph. 268: 371-384.
Matthews & du Plessis 2016	2016	Anatomy and Development		1	Anurans			Descriptive	Simulation/Modelling		Matthews, T., du Plessis, A. (2016). Using X-ray computed tomography analysis tools to compare the skeletal element morphology of fossil and modern frog (Anura) species. Palaeontol. Electron. 19: 19.1.1T.
McCurry et al. 2017	2017	Ecology and Evolution		0	Crocodilians			Geometric morphometrics			McCurry, M.R., Evans, A.R., Fitzgerald, E.M., Adams, J.W., Clausen, P.D., McHenry, C.R. (2017). The remarkable convergence of skull shape in crocodilians and toothed whales. Proc. R. Soc. B. 284: 20162348.
McCurry et al. 2015	2015	Biomechanics		0	Crocodilians			Simulation/Modelling			McCurry, M.R., Evans, A.R., McHenry, C.R. (2015). The sensitivity of biological finite element models to the resolution of surface geometry: a case study of crocodilian crania. PeerJ 3: p.e988.
McCurry et al. 2015	2015	Ecology and Evolution	Biomechanics	0	Squamates			Geometric morphometrics	Measurement	Simulation/Modelling	McCurry, M.R., Mahony, M., Clausen, P.D., Quayle, M.R., Walmsley, C.W., Jessop, T.S., Wroe, S., Richards, H., McHenry, C.R. (2015). The relationship between cranial structure, biomechanical performance and ecological diversity in varanoid lizards. PloS one 10: p.e0130625.
McCurry et al. 2017	2017	Biomechanics		0	Crocodilians			Simulation/Modelling			McCurry, M.R., Walmsley, C.W., Fitzgerald, E.M.G., McHenry, C.R. (2017). The biomechanical consequences of longirostry in crocodilians and odontocetes. J. biomech. 56: 61-70.
Means et al. 2017	2017	Taxonomy and Systematics		0	Urodeles			Descriptive			Means, D.B., Lamb, J.Y., Bernardo, J. (2017). A new species of dusky salamander (Amphibia: Plethodontidae: Desmognathus) from the Eastern Gulf Coastal Plain of the United States and a redescription of D. auriculatus. Zootaxa 4263: 467-506.
Melstrom 2017	2017	Anatomy and Development	Ecology and Evolution	0	Squamates	Crocodilians		Simulation/Modelling	Geometic morphometrics		Melstrom, K.M. (2017). The relationship between diet and tooth complexity in living dentigerous saurians. J. Morph. 278: 500-522.
Metzger et al. 2005	2005	Biomechanics		0	Crocodilians			Simulation/Modelling			Metzger, K.A., Daniel, W.J., Ross, C.F. (2005). Comparison of beam theory and finite‐element analysis with in vivo bone strain data from the alligator cranium. Anat. Rec. 283: 331-348.
Moazen et al. 2012	2012	Biomechanics		0	Squamates			Simulation/Modelling			Moazen, M., Costantini, D., Bruner, E. (2013). A Sensitivity Analysis to the Role of the Fronto‐Parietal Suture in Lacerta Bilineata: A Preliminary Finite Element Study. Anat. Rec. 296: 198-209.
Moazen et al. 2008	2008	Biomechanics		0	Squamates			Simulation/Modelling			Moazen, M., Curtis, N., Evans, S.E., O’Higgins, P., Fagan, M.J. (2008). Combined finite element and multibody dynamics analysis of biting in a Uromastyx hardwickii lizard skull. J. Anat. 213: 499-508.
Moazen et al. 2009	2009	Biomechanics		0	Squamates			Simulation/Modelling			Moazen, M., Curtis, N., Evans, S.E., O’Higgins, P., Fagan, M.J. (2008). Rigid-body analysis of a lizard skull: modelling the skull of Uromastyx hardwickii. J. Biomech. 41: 1274-1280.
Moazen et al. 2009	2009	Biomechanics		0	Squamates			Simulation/Modelling			Moazen, M., Curtis, N., O'Higgins, P., Jones, M.E., Evans, S.E., Fagan, M.J. (2009). Assessment of the role of sutures in a lizard skull: a computer modelling study. Proc. R. Soc. B: Biol. Sci. 276: 39-46.
Molnar et al. 2017	2017	Anatomy and Development		0	Squamates			Descriptive			Molnar, J.L., Diaz, R.E., Skorka, T., Dagliyan, G., Diogo, R. (2017). Comparative musculoskeletal anatomy of chameleon limbs, with implications for the evolution of arboreal locomotion in lizards and for teratology. J. Morph. 278: 1241-1261.
Montero et al. 2017	2017	Anatomy and Development	Ecology and Evolution	0	Squamates			Descriptive			Montero, R., Daza, J.D., Bauer, A.M., Abdala, V. (2017). How common are cranial sesamoids among squamates?. J. Morph. 278: 1400-1411.
Moustakas-Verho 2014	2014	Anatomy and Development		0	Testudines			Descriptive			Moustakas-Verho, J.E., Zimm, R., Cebra-Thomas, J., Lempiäinen, N.K., Kallonen, A., Mitchell, K.L., Hämäläinen, K., Jernvall, J., Gilbert, S.F. (2014). The origin and loss of periodic patterning in the turtle shell. Development 141: 3033-3039.
Müller et al. 2011	2011	Taxonomy and Systematics		1	Squamates			Descriptive			Müller, J., Hipsley, C.A., Head, J.J., Kardjilov, N., Hilger, A., Wuttke, M., Reisz, R.R. (2011). Eocene lizard from Germany reveals amphisbaenian origins. Nature 473: 364.
Muller et al. 2016	2016	Taxonomy and Systematics		1	Squamates			Descriptive			Müller, J., Hipsley, C.A., Maisano, J.A. (2016). Skull osteology of the Eocene amphisbaenian Spathorhynchus fossorium (Reptilia, Squamata) suggests convergent evolution and reversals of fossorial adaptations in worm lizards. J. Anat. 229: 615-630.
Muller et al. 2018	2018	Taxonomy and Systematics		1	Squamates			Descriptive			Müller, J., Roberts, E., Naylor, E., Stevens, N. (2018). A Fossil Gekkotan (Squamata) from the Late Oligocene Nsungwe Formation, Rukwa Rift Basin, Tanzania. J. Herp. 52: 223-227.
Nakajima et al. 2014	2014	Anatomy and Development	Ecology and Evolution	0	Testudines			Measurement			Nakajima, Y., Hirayama, R., Endo, H. (2014). Turtle humeral microanatomy and its relationship to lifestyle. Biol. J. Linn. Soc. 112: 719-734.
Nance 2007	2007	Anatomy and Development		0	Squamates			Descriptive			Nance, H.A. (2007). Cranial osteology of the African gerrhosaurid Angolosaurus skoogi (Squamata; Gerrhosauridae). Afr. J. Herp. 56: 39-75.
Natchev et al. 2016	2016	Anatomy and Development	Ecology and Evolution	0	Urodeles			Descriptive			Natchev, N., Handschuh, S., Lukanov, S., Tzankov, N., Naumov, B., Werneburg, I. (2016). Contributions to the functional morphology of caudate skulls: kinetic and akinetic forms. PeerJ 4: p.e2392.
Natchev et al. 2015	2015	Anatomy and Development	Ecology and Evolution	0	Squamates			Descriptive			Natchev, N., Tzankov, N., Vergilov, V., Kummer, S., Handschuh, S. (2015). Functional morphology of a highly specialised pivot joint in the cranio-cervical complex of the minute lizard Ablepharus kitaibelii in relation to feeding ecology and behaviour. Contrib. Zool. 84: 13-23.
Naumann & Olsson 2017	2017	Anatomy and Development		0	Anurans			Descriptive			Naumann, B., Olsson, L. (2018). Three‐dimensional reconstruction of the cranial and anterior spinal nerves in early tadpoles of Xenopus laevis (Pipidae, Anura). J. Comp. Neurol. 526: 836-857.
Oliviera et al. 2018	2018	Taxonomy and Systematics		0	Squamates			Descriptive			Oliviera, E.C., Vaz-Silva, W., Santos-Jr, A.P., Graboski, R., Teixeira, M.J., Dal Vechio, F., Ribeiro, S. (2018). A new four-pored Amphisbaena Linnaeus, 1758 (Amphisbaenia, Amphisbaenidae) from Brazilian Amazon. Zootaxa 4420: 451-474.
Ollonen et al. 2018	2018	Anatomy and Development	Ecology and Evolution	0	Squamates			Geometric morphometrics	Descriptive		Ollonen, J., Da Silva, F.O., Mahlow, K., Di-Poï, N. (2018). Skull Development, Ossification Pattern, and Adult Shape in the Emerging Lizard Model Organism Pogona vitticeps: A comparative analysis with other squamates. Front. Physiol 9: 278.
Olori 2010	2010	Anatomy and Development		0	Squamates			Descriptive			Olori, J.C. (2010). Digital endocasts of the cranial cavity and osseous labyrinth of the burrowing snake Uropeltis woodmasoni (Alethinophidia: Uropeltidae). Copeia 2010: 14-26.
Olori & Bell 2012	2012	Anatomy and Development	Taxonomy and Systematics	0	Squamates			Descriptive			Olori, J.C., Bell, C.J. (2012). Comparative skull morphology of uropeltid snakes (Alethinophidia: Uropeltidae) with special reference to disarticulated elements and variation. PLoS one 7: p.e32450.
Ord et al 2015	2015	Ecology and Evolution		0	Squamates			Descriptive			Ord, T.J., Klomp, D.A., Garcia‐Porta, J., Hagman, M. (2015). Repeated evolution of exaggerated dewlaps and other throat morphology in lizards. J. Evol. Biol. 28: 1948-1964.
Palci & Caldwell 2014	2014	Taxonomy and Systematics		1	Squamates			Descriptive			Palci, A., Caldwell, M.W. (2014). The upper cretaceous snake Dinilysia patagonica Smith‐Woodward, 1901, and the crista circumfenestralis of snakes. J. Morph. 275: 1187-1200.
Palci et al. 2017	2017	Anatomy and Development	Ecology and Evolution	0	Squamates			Geometric morphometrics			Palci, A., Hutchinson, M.N., Caldwell, M.W., Lee, M.S. (2017). The morphology of the inner ear of squamate reptiles and its bearing on the origin of snakes. R. Soc. Open Sci. 4: p.170685.
Palci et al. 2018	2018	Ecology and Evolution		1	Squamates			Geometric morphometrics			Palci, A., Hutchinson, M.N., Caldwell, M.W., Scanlon, J.D., Lee, M.S. (2018). Palaeoecological inferences for the fossil Australian snakes Yurlunggur and Wonambi (Serpentes, Madtsoiidae). R. Soc. Open Sci. 5: 172012.
Palci et al. 2016	2016	Anatomy and Development		0	Squamates			Geometric morphometrics			Palci, A., Lee, M.S., Hutchinson, M.N. (2016). Patterns of postnatal ontogeny of the skull and lower jaw of snakes as revealed by micro‐CT scan data and three‐dimensional geometric morphometrics. J. Anat. 229: 723-754.
Paluh et al. 2017	2017	Anatomy and Development		0	Squamates			Descriptive			Paluh, D.J., Griffing, A.H., Bauer, A.M. (2017). Sheddable armour: identification of osteoderms in the integument of Geckolepis maculata (Gekkota). Afr. J. Herp. 66: 12-24.
Pardo et al. 2017	2017	Taxonomy and Systematics	Anatomy and Development	1	Caecilians			Descriptive			Pardo, J.D., Small, B.J., Huttenlocker, A.K. (2017). Stem caecilian from the Triassic of Colorado sheds light on the origins of Lissamphibia. Proc. Natl. Acad. Sci. 114: E5389-E5395.
Parra-Olea et al. 2016	2016	Taxonomy and Systematics	Anatomy and Development	0	Urodeles			Descriptive			Parra-Olea, G., Rovito, S.M., García-París, M., Maisano, J.A., Wake, D.B., Hanken, J. (2016). Biology of tiny animals: three new species of minute salamanders (Plethodontidae: Thorius) from Oaxaca, Mexico. PeerJ 4: p.e2694.
Pinto et al. 2015	2015	Anatomy and Development		0	Squamates			Descriptive			Pinto, R.R., Martins, A.R., Curcio, F., Ramos, L.D.O. (2015). Osteology and cartilaginous elements of Trilepida salgueiroi (Amaral, 1954) (Scolecophidia: Leptotyphlopidae). Anat. Rec. 298: 1722-1747.
du Plessis et al. 2018	2018	Anatomy and Development	Biomechanics	0	Squamates			Measuremement	Simulation/Modelling		Plessis, A.D., Broeckhoven, C., le Roux, S.G. (2018). Snake fangs: 3D morphological and mechanical analysis by microCT, simulation and physical compression testing. GigaScience 7: 1-8.
Fontanarrosa et al. 2018	2018	Anatomy and Development		1	Squamates			Descriptive			Poinar Jr, G., Philbrick, K.A., Cohn, M.J., Turner, R.T., Iwaniec, U.T., Wunderlich, J. (2017). X-ray microcomputed tomography reveals putative trematode metacercaria in a 100 million year-old lizard (Squamata: Agamidae). Cretaceous Res. 80: 27-30.
Polcyn et al. 2005	2005	Anatomy and Development		1	Squamates			Descriptive			Polcyn, M.J., Jacobs, L.L., Haber, A. (2005). A morphological model and CT assessment of the skull of Pachyrhachis problematicus (Squamata, Serpentes), a 98 million year old snake with legs from the Middle East. Palaeontol. Electron. 8: 1-24.
Polcyn et al. 2002	2002	Taxonomy and Systematics		1	Squamates			Descriptive			Polcyn, M.J., Rogers, J.V., Kobayashi, Y., Jacobs, L.L. (2002). Computed tomography of an Anolis lizard in Dominican amber: systematic, taphonomic, biogeographic, and evolutionary implications. Palaeontol. Electronica 5: 1-13.
Pollard et al. 2016	2016	Anatomy and Development		0	Crocodilians			Measurement			Pollard, A.S., Boyd, S., McGonnell, I.M., Pitsillides, A.A. (2017). The role of embryo movement in the development of the furcula. J. Anat. 230: 435-443.
Pollard et al. 2017	2017	Anatomy and Development		0	Crocodilians			Measurement			Pollard, A.S., Charlton, B.G., Hutchinson, J.R., Gustafsson, T., McGonnell, I.M., Timmons, J.A., Pitsillides, A.A. (2017). Limb proportions show developmental plasticity in response to embryo movement. Sci. Rep. 7: p.41926.
Polly et al. 2016	2016	Biomechanics		0	Testudines			Simulation/Modelling			Polly, P.D., Stayton, C.T., Dumont, E.R., Pierce, S.E., Rayfield, E.J., Angielczyk, K.D. (2016). Combining geometric morphometrics and finite element analysis with evolutionary modeling: towards a synthesis. J. Vert. Paleontol. 36: p.e1111225.
Porro et al. 2017	2017	Biomechanics		0	Anurans			Simulation/Modelling			Porro, L.B., Collings, A.J., Eberhard, E.A., Chadwick, K.P., Richards, C.T. (2017). Inverse dynamic modelling of jumping in the red-legged running frog Kassina maculata. J. Exp. Biol. jeb.155416 doi: 10.1242/jeb.155416.
Porro & Richards 2017	2017	Anatomy and Development		0	Anurans			Descriptive			Porro, L.B., Richards, C.T. (2017). Digital dissection of the model organism Xenopus laevis using contrast‐enhanced computed tomography. J. Anat. 231: 169-191.
Porter et al. 2016	2016	Anatomy and Development		0	Crocodilians			Descriptive			Porter, W.R., Sedlmayr, J.C., Witmer, L.M. (2016). Vascular patterns in the heads of crocodilians: blood vessels and sites of thermal exchange. J. Anat. 229: 800-824.
Ruger Porter & Witmer 2015	2015	Anatomy and Development		0	Squamates			Descriptive			Porter, W.R., Witmer, L.M. (2015). Vascular patterns in iguanas and other squamates: blood vessels and sites of thermal exchange. PloS one 10: p.e0139215.
Poyarkov Jr et al. 2018	2018	Taxonomy and Systematics		0	Anurans			Descriptive			Poyarkov Jr, N.A., Suwannapoom, C., Pawangkhanant, P., Aksornneam, A., Van Duong, T., Korost, D.V., Che, J. (2018). A new genus and three new species of miniaturized microhylid frogs from Indochina (Amphibia: Anura: Microhylidae: Asterophryinae). Zool. Res. 39: 130.
Preininger et al. 2016	2016	Anatomy and Development		0	Anurans			Measurement			Preininger, D., Handschuh, S., Boeckle, M., Sztatecsny, M., Hödl, W. (2016). Comparison of female and male vocalisation and larynx morphology in the size dimorphic foot-flagging frog species Staurois guttatus. Herpetol. J. 26: 187-197.
Pritchard et al. 2014	2014	Taxonomy and Systematics		1	Squamates			Descriptive			Pritchard, A.C., McCartney, J.A., Krause, D.W., Kley, N.J. (2014). New snakes from the Upper Cretaceous (Maastrichtian) Maevarano Formation, Mahajanga Basin, Madagascar. J. Vert. Paleontol. 34: 1080-1093.
Prötzel et al. 2018	2018	Anatomy and Development	Ecology and Evolution	0	Squamates			Measurement			Prötzel, D., Heß, M., Scherz, M.D., Schwager, M., van’t Padje, A., Glaw, F. (2018). Widespread bone-based fluorescence in chameleons. Sci. Rep. 8: 698.
Prötzel et al. 2015	2015	Taxonomy and Systematics		0	Squamates			Measurement			Prötzel, D., Ruthensteiner, B., Scherz, M.D., Glaw, F. (2015). Systematic revision of the Malagasy chameleons Calumma boettgeri and C. linotum (Squamata: Chamaeleonidae). Zootaxa 4048: 211-231.
Prötzel et al. 2018	2018	Taxonomy and Systematics		0	Squamates			Measurement			Prötzel, D., Vences, M., Hawlitschek, O., Scherz, M.D., Ratsoavina, F.M., Glaw, F. (2018). Endangered beauties: micro-CT cranial osteology, molecular genetics and external morphology reveal three new species of chameleons in the Calumma boettgeri complex (Squamata: Chamaeleonidae). Zool. J. Linn. Soc. zlx112, https://doi.org/10.1093/zoolinnean/zlx112.
Prötzel et al. 2017	2017	Taxonomy and Systematics		0	Squamates			Descriptive	Measurement		Prötzel, D., Vences, M., Scherz, M.D., Vieites, D.R., Glaw, F. (2017). Splitting and lumping: An integrative taxonomic assess-ment of Malagasy chameleons in the Calumma guibei complex results in the new species C. gehringi sp. nov. Vertebr. Zool. 67: 231-249.
Rakotoarison et al. 2017	2017	Taxonomy and Systematics		0	Anurans			Descriptive			Rakotoarison, A., Scherz, M.D., Glaw, F., Vences, M. (2017). Rediscovery of frogs belonging to the enigmatic microhylid genus Madecassophryne in the Anosy Massif, south-eastern Madagascar. Salamandra 53: 507-518.
Regnault et al. 2017	2017	Anatomy and Development		0	Rhynchocephalians			Descriptive			Regnault, S., Hutchinson, J.R., Jones, M.E. (2017). Sesamoid bones in tuatara (Sphenodon punctatus) investigated with X‐ray microtomography, and implications for sesamoid evolution in Lepidosauria. J. Morph. 278: 62-72.
Regnault et al. 2016	2016	Anatomy and Development		0	Rhynchocephalians	Squamates		Descriptive			Regnault, S., Jones, M.E., Pitsillides, A.A., Hutchinson, J.R. (2016). Anatomy, morphology and evolution of the patella in squamate lizards and tuatara (Sphenodon punctatus). J. Anat. 228: 864-876.
Reilly & Jorgensen 2011	2011	Ecology and Evolution		0	Anurans			Descriptive			Reilly, S.M., Jorgensen, M.E. (2011). The evolution of jumping in frogs: morphological evidence for the basal anuran locomotor condition and the radiation of locomotor systems in crown group anurans. J. Morph. 272: 149-168.
Ribeiro et al. 2017	2017	Taxonomy and Systematics		0	Anurans			Descriptive			Ribeiro, L.F., Blackburn, D.C., Stanley, E.L., Pie, M.R., Bornschein, M.R. (2017). Two new species of the Brachycephalus pernix group (Anura: Brachycephalidae) from the state of Paraná, southern Brazil. PeerJ 5: p.e3603.
Rice et al. 2016	2016	Anatomy and Development		0	Testudines			Descriptive			Rice, R., Kallonen, A., Cebra-Thomas, J., Gilbert, S.F. (2016). Development of the turtle plastron, the order-defining skeletal structure. Proc. Natl. Acad. Sci. 113: 5317-5322.
Rieppel 2007	2007	Anatomy and Development	Ecology and Evolution	0	Squamates			Descriptive			Rieppel, O. (2007). The naso-frontal joint in snakes as revealed by high-resolution X-ray computed tomography of intact and complete skulls. Zoologischer Anzeiger-A Journal of Comparative Zoology 246: 177-191.
Rieppel et al. 2008	2008	Anatomy and Development	Ecology and Evolution	0	Squamates			Descriptive			Rieppel, O., Gauthier, J., Maisano, J. (2008). Comparative morphology of the dermal palate in squamate reptiles, with comments on phylogenetic implications. Zool. J. Linn. Soc. 152: 131-152.
Rieppel et al. 2009	2009	Anatomy and Development		0	Squamates			Descriptive			Rieppel, O., Kley, N.J., Maisano, J.A. (2009). Morphology of the skull of the white‐nosed blindsnake, Liotyphlops albirostris (Scolecophidia: Anomalepididae). J. Morph. 270: 536-557.
Rieppel & Maisano 2007	2007	Anatomy and Development		0	Squamates			Descriptive			Rieppel, O., Maisano, J.A. (2007). The skull of the rare Malaysian snake Anomochilus leonardi Smith, based on high-resolution X-ray computed tomography. Zool. J. Linn. Soc. 149: 671-685.
Rivera & Stayton 2011	2011	Biomechanics		0	Testudines			Simulation/Modelling			Rivera, G., Stayton, C.T. (2011). Finite element modeling of shell shape in the freshwater turtle Pseudemys concinna reveals a trade‐off between mechanical strength and hydrodynamic efficiency. J. Morph. 272: 1192-1203.
Rivera & Stayton 2013	2013	Biomechanics		0	Testudines			Simulation/Modelling			Rivera, G., Stayton, C.T. (2013). Effects of asymmetry on the strength of the chelonian shell: a comparison of three species. J. Morph. 274: 901-908.
Roček et al. 2015	2015	Taxonomy and Systematics		1	Anurans			Descriptive			Roček, Z., Boistel, R., Lenoir, N., Mazurier, A., Pierce, S.E., Rage, J.C., Smirnov, S.V., Schwermann, A.H., Valentin, X., Venczel, M., Wuttke, M. (2015). Frontoparietal bone in extinct Palaeobatrachidae (Anura). its variation and taxonomic value. Anat. Rec. 298: 1848-1863.
Rowe et al. 2000	2000	Anatomy and Development		1	Squamates			Descriptive			Rowe, T., Brochu, C.A., Colbert, M., Merck, J.W., Kishi, K., Saglamer, E., Warren, S. (1999). Introduction to Alligator: Digital atlas of the skull. J. Vert. Paleontol. 19: 1-8.
Russell et al. 2014	2014	Anatomy and Development		0	Squamates			Descriptive			Russell, A.P., Hood, H.A., Bauer, A.M. (2014). Laryngotracheal and cervical muscular anatomy in the genus Uroplatus (Gekkota: Gekkonidae) in relation to distress call emission. Afr. J. Herp. 63: 127-151.
Salazar-Valenzuela et al. 2015	2015	Taxonomy and Systematics		0	Squamates			Descriptive			Salazar-Valenzuela, D., Martins, A., Amador-Oyola, L., Torres-Carvajal, O. (2015). A new species and country record of threadsnakes (Serpentes: Leptotyphlopidae: Epictinae) from northern Ecuador. Amphibian & Reptile Conservation 8: 107-120.
Sánchez-Vialas et al. 2018	2018	Taxonomy and Systematics		0	Anurans			Descriptive			Sánchez-Vialas, A., Calvo-Revuelta, M., Castroviejo-Fisher, S., De la Riva, I. (2018). The taxonomic status of Petropedetes newtonii (Amphibia, Anura, Petropedetidae). ZooKeys 765: 59.
Sanders et al. 2012	2012	Ecology and Evolution	Anatomy and Development	0	Squamates			Descriptive			Sanders, K.L., Rasmussen, A.R., Elmberg, J. (2012). Independent innovation in the evolution of paddle-shaped tails in viviparous sea snakes (Elapidae: Hydrophiinae). Integr. Comp. Biol. 52: 311-320.
Sanders et al. 2010	2010	Taxonomy and Systematics		0	Squamates			Descriptive			Sanders, K.L., Rasmussen, A.R., Elmberg, J., Mumpuni, S., Guinea, M., Blias, P., Lee, M.S., Fry, B.G. (2012). Aipysurus mosaicus, a new species of egg-eating sea snake (Elapidae: Hydrophiinae), with a re-description of Aipysurus eydouxii (Gray, 1849). Zootaxa 3431: 1-18.
Sanger et al. 2013	2013	Ecology and Evolution	Anatomy and Development	0	Squamates			Geometric morphometrics			Sanger, T.J., Sherratt, E., McGlothlin, J.W., Brodie, E.D., Losos, J.B., Abzhanov, A. (2013). Convergent evolution of sexual dimorphism in skull shape using distinct developmental strategies. Evolution 67: 2180-2193.
Sankhyan & Čerňanský 2016	2016	Taxonomy and Systematics		1	Squamates			Descriptive			Sankhyan, A.R., Čerňanský, A. (2016). A first possible chameleon from the late Miocene of India (the hominoid site of Haritalyangar). a tentative evidence for an Asian dispersal of chameleons. Sci. Nat. 103: 94.
Scanferla & Bhullar 2014	2014	Anatomy and Development		1	Squamates			Descriptive			Scanferla, A., Bhullar, B.A.S. (2014). Postnatal Development of the Skull of Dinilysia patagonica (Squamata‐Stem Serpentes). Anat. Rec. 297: 560-573.
Scanferla et al. 2016	2016	Taxonomy and Systematics	Anatomy and Development	1	Squamates			Descriptive			Scanferla, A., Smith, K.T., Schaal, S.F. (2016). Revision of the cranial anatomy and phylogenetic relationships of the Eocene minute boas Messelophis variatus and Messelophis ermannorum (Serpentes, Booidea). Zool. J. Linn. Soc. 176: 182-206.
Scherz et al. 2017	2017	Taxonomy and Systematics		0	Squamates			Descriptive			Scherz, M.D., Daza, J.D., Köhler, J., Vences, M., Glaw, F. (2017). Off the scale: a new species of fish-scale gecko (Squamata: Gekkonidae: Geckolepis) with exceptionally large scales. PeerJ 5: p.e2955.
Scherz et al. 2016	2016	Taxonomy and Systematics		0	Anurans			Descriptive			Scherz, M.D., Glaw, F., Vences, M., Andreone, F., Crottini, A. (2016). Two new species of terrestrial microhylid frogs (Microhylidae: Cophylinae: Rhombophryne) from northeastern Madagascar. Salamandra 52: 91-106.
Scherz et al. 2017	2017	Taxonomy and Systematics		0	Anurans			Descriptive	Measurement		Scherz, M.D., Hawlitschek, O., Andreone, F., Rakotoarison, A., Vences, M., Glaw, F. (2017). A review of the taxonomy and osteology of the Rhombophryne serratopalpebrosa species group (Anura: Microhylidae) from Madagascar, with comments on the value of volume rendering of micro-CT data to taxonomists. Zootaxa 4273: 301-340.
Scherz et al. 2015	2015	Taxonomy and Systematics		0	Anurans			Descriptive			Scherz, M.D., Rakotoarison, A., Hawlitschek, O., Vences, M., Glaw, F. (2015). Leaping towards a saltatorial lifestyle? An unusually long-legged new species of Rhombophryne (Anura, Microhylidae) from the Sorata massif in northern Madagascar. Zoosyst. Evol. 91: 105.
Scherz et al. 2014	2014	Taxonomy and Systematics		0	Anurans			Descriptive			Scherz, M.D., Ruthensteiner, B., Vences, M., Glaw, F. (2014). A new microhylid frog, genus Rhombophryne, from northeastern Madagascar, and a re-description of R. serratopalpebrosa using micro-computed tomography. Zootaxa 3860: 547-560.
Scherz et al. 2015	2015	Taxonomy and Systematics		0	Anurans			Descriptive			Scherz, M.D., Ruthensteiner, B., Vieites, D.R., Vences, M., Glaw, F. (2015). Two new microhylid frogs of the genus Rhombophryne with superciliary spines from the Tsaratanana Massif in northern Madagascar. Herpetologica 71: 310-321.
Scherz et al. 2016	2016	Taxonomy and Systematics		0	Anurans			Descriptive			Scherz, M.D., Vences, M., Rakotoarison, A., Andreone, F., Köhler, J., Glaw, F., Crottini, A. (2016). Reconciling molecular phylogeny, morphological divergence and classification of Madagascan narrow-mouthed frogs (Amphibia: Microhylidae). Mol. Phylogenet. Evol. 100: 372-381.
Schmidt et al. 2011	2011	Anatomy and Development		0	Anurans			Descriptive			Schmidt, J., Schuff, M., Olsson, L. (2011). A role for FoxN3 in the development of cranial cartilages and muscles in Xenopus laevis (Amphibia: Anura: Pipidae) with special emphasis on the novel rostral cartilages. J. Anat. 218: 226-242.
Sharpe et al. 2013	2013	Biomechanics		0	Squamates			Descriptive			Sharpe, S.S., Ding, Y., Goldman, D.I. (2013). Environmental interaction influences muscle activation strategy during sand-swimming in the sandfish lizard Scincus scincus. J. Exp. Biol. 216: 260-274.
Sherratt et al. 2015	2015	Ecology and Evolution		1	Squamates			Measurement			Sherratt, E., del Rosario Castañeda, M., Garwood, R.J., Mahler, D.L., Sanger, T.J., Herrel, A., de Queiroz, K., Losos, J.B. (2015). Amber fossils demonstrate deep-time stability of Caribbean lizard communities. PNAS 112: 9961-9966.
Wilkinson et al. 2011	2011	Taxonomy and Systematics		0	Caecilians			Descriptive			Sherratt, E., Gower, D.J., Klingenberg, C.P., Wilkinson, M. (2014). Evolution of cranial shape in caecilians (Amphibia: Gymnophiona). Evol. Biol. 41: 528-545.
Simões et al. 2018	2018	Taxonomy and Systematics		1	Squamates			Descriptive			Simões, T.R., Caldwell, M.W., Tałanda, M., Bernardi, M., Palci, A., Vernygora, O., Bernardini, F., Mancini, L., Nydam, R.L. (2018). The origin of squamates revealed by a Middle Triassic lizard from the Italian Alps. Nature 557: 706.
Simões et al. 2016	2016	Biomechanics		0	Squamates			Simulation/Modelling			Simões, T.R., Funston, G.F., Vafaeian, B., Nydam, R.L., Doschak, M.R., Caldwell, M.W. (2016). Reacquisition of the lower temporal bar in sexually dimorphic fossil lizards provides a rare case of convergent evolution. Sci. Rep. 6: 24087.
Skutschas et al. 2018	2018	Anatomy and Development		1	Urodeles			Descriptive			Skutschas, P., Kolchanov, V., Boitsova, E., Kuzmin, I. (2018). Osseous anomalies of the cryptobranchid Eoscapherpeton asiaticum (Amphibia: Caudata) from the Late Cretaceous of Uzbekistan. Mitteilungen aus dem Museum für Naturkunde in Berlin. Fossil Rec. 21: 159.
Skutschas & Gubin 2011	2011	Taxonomy and Systematics		1	Urodeles			Descriptive			Skutschas, P.P., Gubin, Y.M. (2012). A new salamander from the late Paleocene—early Eocene of Ukraine. Acta Palaeontol. Pol. 57: 135-148.
Slater et al. 2009	2009	Anatomy and Development		0	Anurans			Descriptive			Slater, B.J., Liu, K.J., Kwan, M.D., Quarto, N., Longaker, M.T. (2009). Cranial osteogenesis and suture morphology in Xenopus laevis: a unique model system for studying craniofacial development. PloS one 4: p.e3914.
Smith & Scanferla 2016	2016	Ecology and Evolution		1	Squamates			Descriptive			Smith, K.T., Scanferla, A. (2016). Fossil snake preserving three trophic levels and evidence for an ontogenetic dietary shift. Palaeobio. Palaeoenv. 96: 589-599.
Souza et al. 2015	2015	Anatomy and Development		0	Squamates			Descriptive			Souza, N.M., Maggs, D.J., Park, S., Puchalski, S.M., Reilly, C.M., Paul‐Murphy, J., Murphy, C.J. (2015). Gross, histologic, and micro‐computed tomographic anatomy of the lacrimal system of snakes. Vet. Ophthalmol. 18: 15-22.
Stanley et al. 2016	2016	Taxonomy and Systematics		0	Squamates			Descriptive			Stanley, E.L., Ceriaco, L.M., Bandeira, S.U.Z.A.N.A., Valerio, H.I.L.A.R.I.A., Bates, M.F., Branch, W.R. (2016). A review of Cordylus machadoi (Squamata: Cordylidae) in southwestern Angola, with the description of a new species from the Pro-Namib desert. Zootaxa 4061: 201-226.
Stayton 2009	2009	Biomechanics		0	Testudines			Simulation/Modelling			Stayton, C.T. (2009). Application of thin‐plate spline transformations to finite element models, or, how to turn a bog turtle into a spotted turtle to analyze both. Evolution 63: 1348-1355.
Stayton 2011	2011	Biomechanics		0	Testudines			Simulation/Modelling			Stayton, C.T. (2011). Biomechanics on the half shell: functional performance influences patterns of morphological variation in the emydid turtle carapace. Zoology 114: 213-223.
Sterli et al. 2010	2010	Anatomy and Development		1	Testudines			Descriptive			Sterli, J., Müller, J., Anquetin, J., Hilger, A. (2010). The parabasisphenoid complex in Mesozoic turtles and the evolution of the testudinate basicranium. Can. J. Earth Sci. 47: 1337-1346.
Sullivan 2010	2010	Biomechanics		0	Squamates			Simulation/Modelling			Sullivan, C. (2010). The role of the calcaneal ‘heel’ as a propulsive lever in basal archosaurs and extant monitor lizards. J. Vert. Paleo. 30: 1422-1432.
Suwannapoom et al. 2018	2018	Taxonomy and Systematics		0	Anurans			Descriptive			Suwannapoom, C., Sumontha, M., Tunprasert, J., Ruangsuwan, T., Pawangkhanant, P., Korost, D.V., Poyarkov, N.A. (2018). A striking new genus and species of cave-dwelling frog (Amphibia: Anura: Microhylidae: Asterophryinae) from Thailand. PeerJ 6: p.e4422.
Talada 2016	2016	Taxonomy and Systematics		1	Squamates			Descriptive			Tałanda, M. (2016). Cretaceous roots of the amphisbaenian lizards. Zool. Scripta 45: 1-8.
Teixeira Jr et al. 2012	2012	Taxonomy and Systematics		0	Anurans			Descriptive			Teixeira Jr, M., Dal Vechio, F., Recoder, R.S., Carnaval, A.C., Strangas, M., Damasceno, R.P., Sena, M.D., Rodrigues, M.T. (2012). Two new species of marsupial tree-frogs genus Gastrotheca Fitzinger, 1843 (Anura, Hemiphractidae) from the Brazilian Atlantic Forest. Zootaxa 3437: 1-23.
Tokita et al. 2018	2018	Anatomy and Development		0	Anurans			Geometric morphometrics			Tokita, M., Hasegawa, Y., Yano, W., Tsuji, H. (2018). Characterization of the Adaptive Morphology of Japanese Stream Toad (Bufo torrenticola) Using Geometric Morphometrics. Zool. Sci. 35: 99-108.
Triep et al. 2013	2013	Biomechanics		0	Squamates			Descriptive	Simulation/Modelling		Triep, M., Hess, D., Chaves, H., Brücker, C., Balmert, A., Westhoff, G., Bleckmann, H. (2013). 3D flow in the venom channel of a spitting cobra: do the ridges in the fangs act as fluid guide vanes?. PloS one 8: p.e61548.
Ukuwela et al. 2013	2013	Taxonomy and Systematics		0	Squamates			Descriptive			Ukuwela, K.D., de Silva, A., Fry, B.G., Lee, M.S., Sanders, K.L. (2013). Molecular evidence that the deadliest sea snake Enhydrina schistosa (Elapidae: Hydrophiinae) consists of two convergent species. Mol. Phylogenet. Evol. 66: 262-269.
Vega & Stayton 2011	2011	Biomechanics		0	Testudines			Simulation/Modelling			Vega, C., Stayton, C.T. (2011). Dimorphism in shell shape and strength in two species of emydid turtle. Herpetologica 67: 397-405.
Vidal-Garcia & Keoch 2017	2017	Ecology and Evolution		0	Anurans			Geometric morphometrics			Vidal-García, M., Keogh, J.S. (2017). Phylogenetic conservatism in skulls and evolutionary lability in limbs–morphological evolution across an ancient frog radiation is shaped by diet, locomotion and burrowing. BMC Evol. Biol. 17: 165.
von Byern et al. 2015	2015	Anatomy and Development		0	Urodeles			Descriptive			von Byern, J., Dicke, U., Heiss, E., Grunwald, I., Gorb, S., Staedler, Y., Cyran, N. (2015). Morphological characterization of the glandular system in the salamander Plethodon shermani (Caudata, Plethodontidae). Zool. 118: 334-347.
von May et al. 2018	2018	Ecology and Evolution		0	Anurans			Descriptive			von May, R., Lehr, E., Rabosky, D.L. (2018). Evolutionary radiation of earless frogs in the Andes: molecular phylogenetics and habitat shifts in high-elevation terrestrial breeding frogs. PeerJ 6: p.e4313.
Wake et al. 2012	2012	Taxonomy and Systematics		0	Urodeles			Descriptive			Wake, D.B., Rovito, S.M., Maisano, J.A., Hanken, J. (2012). Taxonomic status of the enigmatic salamander Cryptotriton adelos (Amphibia: Plethodontidae) from northern Oaxaca, Mexico, with observations on its skull and postcranial skeleton. Zootaxa 3579: 67-70.
Wake & Donnelly 2010	2010	Taxonomy and Systematics		0	Caecilians			Measurement	Descriptive		Wake, M.H., Donnelly, M.A. (2009). A new lungless caecilian (Amphibia: Gymnophiona) from Guyana. Proc. R. Soc. Lond. B. 227: 915-922.
Walmsley et al. 2013	2013	Biomechanics		0	Crocodilians			Geometric morphometrics	Simulation/Modelling	Measurement	Walmsley, C.W., Smits, P.D., Quayle, M.R., McCurry, M.R., Richards, H.S., Oldfield, C.C., Wroe, S., Clausen, P.D., McHenry, C.R. (2013). Why the long face? The mechanics of mandibular symphysis proportions in crocodiles. PLoS one, 8: p.e53873.
Werneburg et al. 2015	2015	Anatomy and Development		0	Squamates			Measurement			Werneburg, I., Polachowski, K.M., Hutchinson, M.N. (2015). Bony skull development in the Argus monitor (Squamata, Varanidae, Varanus panoptes) with comments on developmental timing and adult anatomy. Zoology 118: 255-280.
Widelitz 2017	2017	Anatomy and Development		0	Crocodilians			Descriptive			Widelitz, R.B., Abdelhamid, A., Khan, M.K., Elkarargy, A., Chuong, C.M., Wu, P. (2017). MicroCT imaging on living alligator teeth reveals natural tooth cycling. In Avian and Reptilian Developmental Biology (pp. 355-362). Humana Press, New York, NY.
Wilkinson et al. 2014	2014	Taxonomy and Systematics		0	Caecilians			Descriptive			Wilkinson, M., Kok, P.J., Ahmed, F., Gower, D.J. (2014). Caecilita Wake & Donnelly, 2010 (Amphibia: Gymnophiona) is not lungless: implications for taxonomy and for understanding the evolution of lunglessness. Zootaxa 3779: 383-388.
Wilkinson et al. 2017	2017	Taxonomy and Systematics		0	Caecilians			Descriptive			Wilkinson, M., Malonza, P.K., Campbell, P., Loader, S.P. (2017). A new species of Boulengerula Tornier, 1896 (Amphibia: Gymnophiona: Herpelidae) from Kenya and the “rediscovery” of Boulengerula denhardti. Zootaxa 4286: 525-534.
Wilkinson et al. 2014	2014	Taxonomy and Systematics		0	Caecilians			Descriptive			Wilkinson, M., Presswell, B., Sherratt, E., Papadopoulou, A., Gower, D.J. (2014). A new species of striped Ichthyophis Fitzinger, 1826 (Amphibia: Gymnophiona: Ichthyophiidae) from Myanmar. Zootaxa 3785: 45-58.
Sherratt et al. 2014	2014	Anatomy and Development	Ecology and Evolution	0	Caecilians			Geometric morphometrics			Wilkinson, M., San Mauro, D., Sherratt, E., Gower, D.J. (2011). A nine-family classification of caecilians (Amphibia: Gymnophiona). Zootaxa 2874: 41-64.
Willaert et al. 2013	2013	Anatomy and Development		0	Anurans			Descriptive			Willaert, B., Bossuyt, F., Janssenswillen, S., Adriaens, D., Baggerman, G., Matthijs, S., Pauwels, E., Proost, P., Raepsaet, A., Schoofs, L., Stegen, G. (2013). Frog nuptial pads secrete mating season-specific proteins related to salamander pheromones. J. Exp. Biol. 216: 4139-4143.
Willis et al. 2013	2013	Anatomy and Development		0	Testudines			Descriptive			Willis, K.L., Christensen-Dalsgaard, J., Ketten, D.R., Carr, C.E. (2013). Middle ear cavity morphology is consistent with an aquatic origin for testudines. PLoS one 8: p.e54086.
Wu et al. 2013	2013	Anatomy and Development		0	Crocodilians			Descriptive			Wu, P., Wu, X., Jiang, T.X., Elsey, R.M., Temple, B.L., Divers, S.J., Glenn, T.C., Yuan, K., Chen, M.H., Widelitz, R.B., Chuong, C.M. (2013). Specialized stem cell niche enables repetitive renewal of alligator teeth. PNAS 110: E2009-E2018.
Xing et al. 2018	2018	Taxonomy and Systematics		1	Squamates			Descriptive			Xing, L., Caldwell, M.W., Chen, R., Nydam, R.L., Palci, A., Simões, T.R., McKellar, R.C., Lee, M.S.Y., Liu, Y., Shi, H., Wang, K., Bai, M. (2018). A mid-Cretaceous embryonic-to-neonate snake in amber from Myanmar. Sci. Adv. 4: eaat5042.
Xing et al. 2018	2018	Taxonomy and Systematics		1	Anurans			Descriptive			Xing, L., Stanley, E.L., Bai, M., Blackburn, D.C. (2018). The earliest direct evidence of frogs in wet tropical forests from Cretaceous Burmese amber. Sci. Rep. 8: 8770.
Yi & Norell 2015	2015	Ecology and Evolution		1	Squamates			Geometric morphometrics			Yi, H., Norell, M.A. (2015). The burrowing origin of modern snakes. Sci. Adv. 1: p.e1500743.
Young et al. 2008	2008	Anatomy and Development		0	Squamates			Descriptive			Young, B.A., Boetig, M., Westhoff, G. (2008). Functional bases of the spatial dispersal of venom during cobra “spitting”. Physiol. Biochem. Zool. 82: 80-89.
Young & Kardong 2010	2010	Anatomy and Development		0	Squamates			Descriptive			Young, B.A., Kardong, K.V. (2010). The functional morphology of hooding in cobras. J. Exp. Biol. 213: 1521-1528.
Zahradnicek et al. 2008	2008	Anatomy and Development		0	Squamates			Descriptive			Zahradnicek, O., Horacek, I., Tucker, A.S. (2008). Viperous fangs: development and evolution of the venom canal. Mech. Develop. 125: 786-796.

## Sheet: µCT Settings and Sample Info
Short reference	Use of previously published datasets or databases?	X-ray microtomography scanner set-up	Synchrotron microtomography set-up	Resolution (µm)	Voltage (kV)	Current (µA)	Filtration reported?	Type of filtration	Exposure time (ms)	Total scan time (min)	Type of material?	How mounted?	Use of staining?	Staining method	Number of specimens	Number of species	Specimen/Species Ratio	Full reference
Abramyan et al. 2014	0	Scanco µCT					0				preserved/fixed		0			1		Abramyan, J., Leung, K.J.M., Richman, J.M. (2014). Divergent palate morphology in turtles and birds correlates with differences in proliferation and BMP2 expression during embryonic development. J. Exp. Zool. B. Mol. Dev. Evol. 322: 73-85.
Achrai & Wagner 2013	0	Zeiss Xradia MicroXCT			40	200	0				dried	fixed in holder	0			1		Achrai, B., Wagner, H.D. (2013). Micro-structure and mechanical properties of the turtle carapace as a biological composite shield. Acta Biomater. 9: 5890-5902.
Alfonso et al. 2017	0	GE Vtomex					0				preserved/fixed		0			1		Alfonso, Y.U., Rodríguez-Gómez, Y., Charruau, P., Sanz-Ochotorena, A., Krysko, K.L. (2017). Oviposition and Gonadal Ultrastructure in the Cuban Groin-spot Frog, Eleutherodactylus atkinsi Dunn, 1925 (Anura: Eleutherodactylidae). Copeia 105: 781-790.
Allemand et al. 2017	0	Viscom	ID19/BM5	17.225			0				skull		0		45	43	1.04651	Allemand, R., Boistel, R., Daghfous, G., Blanchet, Z., Cornette, R., Bardet, N., Vincent, P., Houssaye, A. (2017). Comparative morphology of snake (Squamata) endocasts: evidence of phylogenetic and ecological signals. J. Anat. 231: 849-868.
Anderson Maisano 2002	0			70			0				preserved/fixed		0		1	1	1	Anderson Maisano, J., Bell, C.J., Gauthier, J.A., Rowe, T. (2002). The osteoderms and palpebral in Lanthanotus borneensis (Squamata: Anguimorpha). J. Herp. 36: 678-682.
Andjelković et al. 2016	0	Bruker Skyscan series		26.1	74		1	0.5 Al	515		preserved/fixed		0		66	2	33	Andjelković, M., Tomović, L., Ivanović, A. (2016). Variation in skull size and shape of two snake species (Natrix natrix and Natrix tessellata). Zoomorphology 135: 243-253.
Andjelković et al. 2017	1						0						0		66	2	33	Andjelković, M., Tomović, L., Ivanović, A. (2017). Morphological integration of the kinetic skull in Natrix snakes. J. Zool. 303: 188-198.
Ascarrunz et al. 2016	0	GE Vtomex		62.2	145	420	0		1000		fossil		0		1	1	1	Ascarrunz, E., Rage, J.C., Legreneur, P., Laurin, M. (2016). Triadobatrachus massinoti, the earliest known lissamphibian (Vertebrata: Tetrapoda) re-examined by μCT scan, and the evolution of trunk length in batrachians. Contrib. Zool. 85: 201-234.
Baeckens et al. 2017	0	Bruker Skyscan series		5.4			1			60	preserved/fixed	on metal disc with adhesive wax, placed in closed-off custom-made Plexiglass case	1	PMA		26		Baeckens, S., Herrel, A., Broeckhoven, C., Vasilopoulou-Kampitsi, M., Huyghe, K., Goyens, J., Van Damme, R. (2017). Evolutionary morphology of the lizard chemosensory system. Sci. Rep. 7: 10141.
Bailon et al. 2014	0	Viscom system		24.4	90	248	0				fossil		0		4	1	4	Bailon, S., Boistel, R., Bover, P., Alcover, J.A. (2014). Maioricalacerta rafelinensis, gen. et sp. nov.(Squamata, Lacertidae), from the early Pliocene of Mallorca (Balearic Islands, western Mediterranean Sea). J. Vert. Paleontol. 34: 318-326.
Bauer et al. 2018	0	Zeiss Xradia MicroXCT			99		0				preserved/fixed		0		1	1	1	Bauer, A.M., Beach-Mehrotra, M., Bermudez, Y., Clark, G.E., Daza, J.D., Glynne, E., Hagyari, D., Harnden, J.M., Holovacs, N., Kanasiro, A., Lofthus, A.J. (2018). The tiny skull of the peruvian gecko Pseudogonatodes barbouri (Gekkota: Sphaerodactylidae) obtained via a divide-and-conquer approach to morphological data acquisition. S. Am. J. Herpetol. 13: 102-116.
Bellati et al. 2018	0	GE Nanotom			140	80	0		750	25	preserved/fixed		0		6	6	1	Bellati, A., Scherz, M.D., Megson, S., Roberts, S.H., Andreone, F., Rosa, G.M., Noël, J., Randrianirina, J.E., Fasola, M., Glaw, F., Crottini, A. (2018). Resurrection and re-description of Plethodontohyla laevis (Boettger, 1913) and transfer of Rhombophryne alluaudi (Mocquard, 1901) to the genus Plethodontohyla (Amphibia, Microhylidae, Cophylinae). Zoosyst. Evol. 94: 109.
Bergmann & Berk 2012	1						0						0					Bergmann, P.J., Berk, C.P. (2012). The evolution of positive allometry of weaponry in horned lizards (Phrynosoma). Evol. Biol. 39: 311-323.
Bever et al. 2005	0						0				preserved/fixed		0		2	2	1	Bever, G.S., Bell, C.J., Maisano, J.A. (2005). The ossified braincase and cephalic osteoderms of Shinisaurus crocodilurus (Squamata, Shinisauridae). Palaeontol. Electron. 8: 1-36.
Bhullar 2011	0						0				preserved/fixed		0		5	5	1	Bhullar, B.S. (2011). The power and utility of morphological characters in systematics: a fully resolved phylogeny of Xenosaurus and its fossil relatives (Squamata: Anguimorpha). Bull Mus. Comp. Zool. 160: 65-181.
Blanco et al. 2015	1						0						0		5	5	1	Blanco, R.E., Jones, W.W., Villamil, J. (2015). The ‘death roll’ of giant fossil crocodyliforms (Crocodylomorpha: Neosuchia). allometric and skull strength analysis. Hist. Biol. 27: 514-524.
Bochaton et al. 2016	1						0						0		1	1	1	Bochaton, C., Boistel, R., Casagrande, F., Grouard, S., Bailon, S. (2016). A fossil Diploglossus (Squamata, Anguidae) lizard from Basse-Terre and Grande-Terre Islands (Guadeloupe, French West Indies). Sci. Rep. 6: p.28475.
Bochaton et al. 2015	0	Viscom system		73.55	100	33	0				preserved/fixed		0		1	1	1	Bochaton, C., Boistel, R., Charles, L. (2015). X-ray microtomography provides first data about the feeding behaviour of an endangered lizard, the Montserrat galliwasp (Diploglossus montisserrati). R. Soc. Open Sci. 2: p.150461.
Boistel et al. 2011	0	Viscom system, Nikon XTH series	ID19/BM5	25.47			0				preserved/fixed		0		17	1	17	Boistel, R., Herrel, A., Lebrun, R., Daghfous, G., Tafforeau, P., Losos, J.B., Vanhooydonck, B. (2011). Shake rattle and roll: the bony labyrinth and aerial descent in squamates. Integr. Comp. Biol. 51: 957-968.
Bona et al. 2017	1						0						0		1	1	1	Bona, P., Carabajal, A.P., Gasparini, Z. (2017). Neuroanatomy of Gryposuchus neogaeus (Crocodylia, Gavialoidea). a first integral description of the braincase and endocranial morphological variation in extinct and extant gavialoids. Earth Env. Sci. T. R. So. 106: 235-246.
Bornschein et al. 2016	0	GE Vtomex		10.52	60	175	0				preserved/fixed		0		1	1	1	Bornschein, M.R., Ribeiro, L.F., Blackburn, D.C., Stanley, E.L., Pie, M.R. (2016). A new species of Brachycephalus (Anura: Brachycephalidae) from Santa Catarina, southern Brazil. PeerJ 4: p.e2629.
Boughner et al. 2007	0	Bruker Skyscan series, Scanco vivaCT			100		0				preserved/fixed		0		2	1	2	Boughner, J.C., Buchtová, M., Fu, K., Diewert, V., Hallgrímsson, B., Richman, J.M. (2007). Embryonic development of Python sebae–I: Staging criteria and macroscopic skeletal morphogenesis of the head and limbs. Zoology 110: 212-230.
Brinkman et al. 2006 2007	0						0				fossil		0		1	1	1	Brinkman, D., Hart, M., Jamniczky, H., Colbert, M. (2006). Nichollsemys baieri gen. et sp. nov, a primitive chelonioid turtle from the late Campanian of North America. Paludicola 5: 111-124.
Broeckhoven et al. 2018	0	GE Vtomex		32.5	80	120	0				preserved/fixed		0		174	4	43.5	Broeckhoven, C., de Kock, C., Hui, C. (2018). Sexual dimorphism in the dermal armour of cordyline lizards. Biol. J. Linn. Soc. bly096, https://doi.org/10.1093/biolinnean/bly096
Broeckhoven et al. 2017	0	GE Vtomex		33	120	180	0				preserved/fixed		0		86	1	86	Broeckhoven, C., de Kock, C., Mouton, P.L.F.N. (2017). Sexual dimorphism in osteoderm expression and the role of male intrasexual aggression. Biol, J. Linn. Soc. 122: 329-339.
Broeckhoven et al. 2016	0	GE Vtomex					0						0			28		Broeckhoven, C., Diedericks, G., Hui, C., Makhubo, B.G., Mouton, P.le F.N. (2016). Enemy at the gates: rapid defensive trait diversification in an adaptive radiation of lizards. Evolution 70: 2647-2656.
Broeckhoven & du Plessis 2017	0	GE Vtomex, GE Nanotom		53	110	200	0				preserved/fixed		0		40	20	2	Broeckhoven, C., du Plessis, A. (2017). Has snake fang evolution lost its bite? New insights from a structural mechanics viewpoint. Biol. Lett. 13: p.20170293.
Broeckhoven et al. 2017	0	GE Vtomex		20	160	90	0				preserved/fixed	dried prior	0		18	2	9	Broeckhoven, C., du Plessis, A., Hui, C. (2017). Functional trade-off between strength and thermal capacity of dermal armor: insights from girdled lizards. J. Mech. Behav. Biomed. Mater. 74: 189-194.
Broeckhoven et al. 2018	0	GE Vtomex		65	120	180	0				preserved/fixed		0			27		Broeckhoven, C., El Adak, Y., Hui, C., Van Damme, R., Stankowich, T. (2018). On dangerous ground: the evolution of body armour in cordyline lizards. Proc. R. Soc. B. 285: 20180513.
Broeckhoven et al. 2018	0	GE Vtomex, GE Nanotom		20	65	150	1	0.1 Cu			preserved/fixed + live	between styroplates in styro holder	0		211	1	211	Broeckhoven, C., Mouton, P.L.F.N., Hui, C. (2018). Proximate causes of variation in dermal armour: insights from armadillo lizards. Oikos. https://doi.org/10.1111/oik.05401.
Brusatte et al. 2016	1						0						0		1	1	1	Brusatte, S.L., Muir, A., Young, M.T., Walsh, S., Steel, L., Witmer, L.M. (2016). The braincase and neurosensory anatomy of an Early Jurassic marine crocodylomorph: implications for crocodylian sinus evolution and sensory transitions. Anat. Rec. 299: 1511-1530.
Buchtova et al. 2013	0	GE eXplore Locus		14	80	80	0						0		1	1	1	Buchtová, M., Zahradníček, O., Balková, S., Tucker, A.S. (2013). Odontogenesis in the veiled Chameleon (Chamaeleo calyptratus). Arc. Oral Biol. 58: 118-133.
Buckley et al. 2010	0				190	140	1	none					0		2	2	1	Buckley, D., Wake, M.H., Wake, D.B. (2010). Comparative skull osteology of Karsenia koreana (Amphibia, Caudata, Plethodontidae). J. Morph. 271: 533-558.
Cadena 2016	1						0						0		2	2	1	Cadena, E. (2016). Palaeoamyda messeliana nov. comb.(Testudines, Pan-Trionychidae) from the Eocene Messel Pit and Geiseltal localities, Germany, taxonomic and phylogenetic insights. PeerJ 4: p.e2647.
Cadena & Jaramillo 2015	1	Werth Tomoscope		2.5	190	220	0		300		fossil + skeletal		0		2	2	1	Cadena, E.A., Jaramillo, C.A. (2015). The first fossil skull of Chelus (Pleurodira: Chelidae, Matamata turtle) from the early Miocene of Colombia. Palaeontol. Electron. 18: 1-10.
Caldwell et al. 2015	1						0						0		20	20	1	Caldwell, M.W., Nydam, R.L., Palci, A., Apesteguía, S. (2015). The oldest known snakes from the Middle Jurassic-Lower Cretaceous provide insights on snake evolution. Nat. Commun. 6: p.5996.
Caut et al. 2013	0	Viscom system		74.7	90	600	0				preserved/fixed		0		1	1	1	Caut, S., Holden, M., Jowers, M.J., Boistel, R., Ineich, I. (2013). Is Bocourt’s terrific skink really so terrific? Trophic myth and reality. PloS one 8: p.e78638.
Čerňanský 2016	0	GE Nanotom		9	80	200	0				skeletal		0		42	32	1.3125	Čerňanský, A. (2016). From lizard body form to serpentiform morphology: The atlas–axis complex in African cordyliformes and their relatives. J. Moph. 277: 512-536.
Čerňanský ey al. 2017	0	GE Vtomex		37.5	180	160	0				fossil		0		1	1	1	Čerňanský, A., Bolet, A., Müller, J., Rage, J.C., Augé, M., Herrel, A. (2017). A new exceptionally preserved specimen of Dracaenosaurus (Squamata, Lacertidae) from the Oligocene of France as revealed by micro-computed tomography. J. Vert. Paleontol. 37: e1384738.
Čerňanský & Klembara 2017	0	GE Vtomex, GE Nanotom		23.925	120	156.75	0				fossil		0		2			Čerňanský, A., Klembara, J. (2017). A skeleton of Ophisaurus (Squamata: Anguidae) from the middle Miocene of Germany, with a revision of the partly articulated postcranial material from Slovakia using micro-computed tomography. J. Vert. Paleontol. 37: e1333515.
Čerňanský & Smith 2017	0	Werth Tomoscope		25.175	165	200	0				fossil		0		1	1	1	Čerňanský, A., Smith, K.T. (2017). Eolacertidae: a new extinct clade of lizards from the Palaeogene; with comments on the origin of the dominant European reptile group–Lacertidae. Hist. Biol. DOI: 10.1080/08912963.2017.1327530.
Chen et al. 2015	0	Bruker Skyscan series		36	50		0		110		skeletal		0					Chen, I.H., Yang, W., Meyers, M.A. (2015). Leatherback sea turtle shell: a tough and flexible biological design. Acta Biomater. 28: 2-12.
Chen et al. 2016	0	GE Vtomex			180		0				fossil		0		1	1	1	Chen, J., Bever, G.S., Yi, H.Y., Norell, M.A. (2016). A burrowing frog from the late Paleocene of Mongolia uncovers a deep history of spadefoot toads (Pelobatoidea) in East Asia. Sci. Rep. 6: p.19209.
Chen et al. 2012	0	Nikon XTH series			53	126.667	0			17.5	preserved/fixed		1	Hexabrix		1		Chen, Y., Lin, G., Chen, Y., Fok, A., Slack, J.M. (2012). Micro‐computed tomography for visualizing limb skeletal regeneration in young xenopus frogs. Anat. Rec. 295: 1562-1565.
Christensen et al. 2012	0	Scanco μCT					0			35			0		1	1	1	Christensen, C.B., Christensen-Dalsgaard, J., Brandt, C., Madsen, P.T. (2012). Hearing with an atympanic ear: good vibration and poor sound-pressure detection in the royal python, Python regius. J. Exp. Biol. 215: 331-342.
Christensen et al. 2015	0	Scanco µCT		49	57.2		0			35	preserved/fixed		1	I	4	2	2	Christensen, C.B., Lauridsen, H., Christensen-Dalsgaard, J., Pedersen, M., Madsen, P.T. (2015). Better than fish on land? Hearing across metamorphosis in salamanders. Proc. R. Soc. Lond. B. Biol. Sci. 282: p.20141943.
Clarac et al. 2017	1						0						0		3	3	1	Clarac, F., De Buffrénil, V., Brochu, C., Cubo, J. (2017). The evolution of bone ornamentation in Pseudosuchia: morphological constraints versus ecological adaptation. Biol. J. Linn. Soc. 121: 395-408.
Clarac et al. 2016	1						0						0		3	3	1	Clarac, F., Souter, T., Cubo, J., Buffrénil, V., Brochu, C., Cornette, R. (2016). Does skull morphology constrain bone ornamentation? A morphometric analysis in the Crocodylia. J. Anat. 229: 292-301.
Comanns et al. 2017	0	Zeiss Xradia MicroXCT		1.5	40	75	0		6000		preserved/fixed	fixed in position in a polyethylene tube	1	I		1		Comanns, P., Esser, F.J., Kappel, P.H., Baumgartner, W., Shaw, J., Withers, P.C. (2017). Adsorption and movement of water by skin of the Australian thorny devil (Agamidae: Moloch horridus). R. Soc. Open Sci. 4: 170591.
Conrad & Daza 2015	1						0						0		1	1	1	Conrad, J.L., Daza, J.D. (2015). Naming and rediagnosing the Cretaceous gekkonomorph (Reptilia, Squamata) from Öösh (Övörkhangai, Mongolia). J. Vert. Paleontol. 35: p.e980891.
Conrad & Norell 2006	0			12.2	180	133	0				fossil		0		1	1	1	Conrad, J.L., Norell, M.A. (2006). High-resolution x-ray computed tomography of an Early Cretaceous gekkonomorph (Squamata) from Öösh (Övörkhangai; Mongolia). Hist. Biol. 18: 405-431.
Costantini et al. 2010	0	Scanco µCT		36	45	88	0		800	120	skeletal		0		18	3	6	Costantini, D., Alonso, M.L., Moazen, M., Bruner, E. (2010). The relationship between cephalic scales and bones in lizards: a preliminary microtomographic survey on three lacertid species. Anat. Rec. 293: 183-194.
Cundall et al. 2017	0	Bruker Skyscan series					0				preserved/fixed		0		1	1	1	Cundall, D., Fernandez, E., Irish, F. (2017). The suction mechanism of the pipid frog, Pipa pipa (Linnaeus, 1758). J. Morph. 278: 1229-1240.
Curtis et al. 2009	1						0				skull		0		2	2	1	Curtis, N., Fagan, M.J., Jones, M.E.H., Evans, S.E., O'Higgins, P. (2009). Visualising muscle anatomy using three-dimensional computer models-an example using the head and neck muscles of Sphenodon. Palaeontol. Electron. 12: 7T.
Curtis et al. 2010	1						0						0		1	1	1	Curtis, N., Jones, M.E., Evans, S.E., Shi, J., O'Higgins, P., Fagan, M.J. (2010). Predicting muscle activation patterns from motion and anatomy: modelling the skull of Sphenodon (Diapsida: Rhynchocephalia). J. R. Soc. Interface 7: 153-160.
Curtis et al. 2010	1						0						0					Curtis, N., Jones, M.E., Lappin, A.K., O’Higgins, P., Evans, S.E., Fagan, M.J. (2010). Comparison between in vivo and theoretical bite performance: using multi-body modelling to predict muscle and bite forces in a reptile skull. J. Biomech. 43: 2804-2809.
Curtis et al. 2011	1						0						0		1	1	1	Curtis, N., Jones, M.E., Shi, J., O'Higgins, P., Evans, S.E., Fagan, M.J. (2011). Functional relationship between skull form and feeding mechanics in Sphenodon, and implications for diapsid skull development. PLOS one 6: p.e29804.
Curtis et al. 2013	1						0						0					Curtis, N., Jones, M.E.H., Evans, S.E., O'higgins, P., Fagan, M.J. (2013). Cranial sutures work collectively to distribute strain throughout the reptile skull. J. R. Soc. Interface 10: 20130442.
Da Silva et al. 2018	1	Bruker Skyscan series, GE Nanotom					0						0		161	143	1.12587	Da Silva, F.O., Fabre, A.C., Savriama, Y., Ollonen, J., Mahlow, K., Herrel, A., Müller, J., Di-Poï, N. (2018). The ecological origins of snakes as revealed by skull evolution. Nat. Commun. 9: 376.
Daza et al. 2012	1						0						0		13	13	1	Daza, J.D., Abdala, V., Arias, J.S., García-López, D., Ortiz, P. (2012). Cladistic analysis of Iguania and a fossil lizard from the late Pliocene of northwestern Argentina. J. Herpetol. 46: 104-119.
Daza et al. 2012	0			6.3	180	130	0				preserved/fixed		0		1	1	1	Daza, J.D., Aurich, J., Bauer, A.M. (2012). Anatomy of an enigma: an osteological investigation of the Namibian festive gecko (Narudasia festiva: Gekkonidae: Gekkota). Acta Zool. 93: 465-486.
Daza & Bauer 2010	1						0						0		2	2	1	Daza, J.D., Bauer, A.M. (2012). A new amber-embedded sphaerodactyl gecko from Hispaniola, with comments on morphological synapomorphies of the Sphaerodactylidae. Breviora 529: 1-28.
Daza & Bauer 2012	1			30.905	90		0						0					Daza, J.D., Bauer, A.M. (2012). Temporal bones of the Gekkota support molecular relationships within the Pygopodoidea. J. Herp. 46: 381-386.
Daza et al. 2015	0	Zeiss Xradia MicroXCT, GE Vtomex			140	135	0						0					Daza, J.D., Bauer, A.M., Sand, C., Lilley, I., Wake, T.A., Valentin, F. (2015). Reptile Remains from Tiga (Tokanod), Loyalty Islands, New Caledonia. Pac. Sci. 69: 531-557.
Daza et al. 2013	0			21	200	100	0				fossil		0		2	2	1	Daza, J.D., Bauer, A.M., Snively, E. (2013). Gobekko cretacicus (Reptilia: Squamata) and its bearing on the interpretation of gekkotan affinities. Zool. J. Linn. Soc. 167: 430-448.
Daza et al. 2014	1						0						0					Daza, J.D., Bauer, A.M., Snively, E.D. (2014). On the fossil record of the Gekkota. Anat. Rec. 297: 433-462.
Daza et al. 2017	1						0						0		8	8	1	Daza, J.D., Gamble, T., Abdala, V., Bauer, A.M. (2017). Cool Geckos: Does Plesiomorphy Explain Morphological Similarities between Geckos from the Southern Cone?. J. Herp. 51: 330-342.
Daza et al. 2015	1			57			0				skeletal		0		2	2	1	Daza, J.D., Mapps, A.A., Lewis, P.J., Thies, M.L., Bauer, A.M. (2015). Peramorphic traits in the tokay gecko skull. J. Morph. 276: 915-928.
del Rosario Castañeda et al. 2014	0	Nikon XTH series		12	55	200	1	none	1000		amber		0		2	1	2	del Rosario Castañeda, M., Sherratt, E., Losos, J.B. (2014). The Mexican amber anole, Anolis electrum, within a phylogenetic context: implications for the origins of Caribbean anoles Zool. J. Linn. Soc. 172: 133-144.
DeMar et al. 2017	0	GE Vtomex, Bruker Skyscan series		49.2			0				fossil		0		4	2	2	DeMar, D.G., Conrad, J.L., Head, J.J., Varricchio, D.J., Wilson, G.P. (2017). A new Late Cretaceous iguanomorph from North America and the origin of New World Pleurodonta (Squamata, Iguania). Proc. R. Soc. B. 284: 20161902.
Dollion et al. 2015	0	Viscom system, Nikon XTH series, GE Vtomex	ID19	40.0388	98	400	0		2687.5		fossil + preserved/fixed		0		87	36	2.41667	Dollion, A.Y., Cornette, R., Tolley, K.A., Boistel, R., Euriat, A., Boller, E., Fernandez, V., Stynder, D., Herrel, A. (2015). Morphometric analysis of chameleon fossil fragments from the Early Pliocene of South Africa: a new piece of the chamaeleonid history. Sci. Nat. 102: 2.
Dollion et al. 2017	1						0						0		34	14	2.42857	Dollion, A.Y., Measey, G.J., Cornette, R., Carne, L., Tolley, K.A., Silva, J.M., Boistel, R., Fabre, A.C., Herrel, A. (2017). Does diet drive the evolution of head shape and bite force in chameleons of the genus Bradypodion?. Funct. Ecol. 31: 671-684.
Dong et al. 2018	0			34.4	120	145	1	none			fossil		0		2	1	2	Dong, L., Xu, X., Wang, Y., Evans, S.E. (2018). The lizard genera Bainguis and Parmeosaurus from the Upper Cretaceous of China and Mongolia. Cretaceous Res. 85: 95-108.
Dong et al. 2016	0			25.09	140	100	1	none			fossil		0		4			Dong, L.P., Evans, S.E., Wang, Y. (2016). Taxonomic revision of lizards from the Paleocene deposits of the Qianshan Basin, Anhui, China. Vertebrat. PalAsiatic. 54: 243-268.
Dosedělová et al. 2016	0	GE Vtomex		10	60	110	0		500				0			1		Dosedělová, H., Štěpánková, K., Zikmund, T., Lesot, H., Kaiser, J., Novotný, K., Štembírek, J., Knotek, Z., Zahradníček, O., Buchtová, M. (2016). Age‐related changes in the tooth–bone interface area of acrodont dentition in the chameleon. J. Anat. 229: 356-368.
du Plessis et al. 2018	0				60	240	0			60	skeletal	loaded in rigid foam in a vertical orientation, with the foam attached to a glass rod	0					du Plessis, A., Broeckhoven, C., le Roux, S.G. (2018). Snake fangs: 3D morphological and mechanical analysis by microCT, simulation and physical compression testing. GigaScience 7: 1-8.
Dufeau & Witmer 2015	0	GE eXplore Locus		68.5	70	450	0				preserved/fixed + skeletal + frozen		0		9	1	9	Dufeau, D.L., Witmer, L.M. (2015). Ontogeny of the middle-ear air-sinus system in Alligator mississippiensis (Archosauria: Crocodylia). PloS one 10: p.e0137060.
Evans et al. 2014	0	Scanco vivaCT, Scanco μCT		28	70	114	0				fossil		0					Evans, S.E., Groenke, J.R., Jones, M.E., Turner, A.H., Krause, D.W. (2014). New material of Beelzebufo, a hyperossified frog (Amphibia: Anura) from the Late Cretaceous of Madagascar. PLoS one 9: p.e87236.
Evans et al. 2005	0			38			0				fossil		0		1	1	1	Evans, S.E., Lally, C., Chure, D.C., Elder, A., Maisano, J.A., 2005. A Late Jurassic salamander (Amphibia: Caudata) from the Morrison Formation of North America. Zool. J. Linn. Soc. 143: 599-616.
Evans et al. 2006	0						0				fossil		0		3	1	3	Evans, S.E., Manabe, M., Noro, M., Isaji, S. and Yamaguchi, M., 2006. A long‐bodied lizard from the lower cretaceous of japan. Palaeontology 49: 1143-1165.
Evans & Matsumoto 2015	0				312	202	0				fossil		0					Evans, S.E., Matsumoto, R. (2015). An assemblage of lizards from the Early Cretaceous of Japan. Palaeontol. Electron. 18: 1-36.
Fernandez et al. 2015	0		ID19	5.06			0		2500		fossil		0		6	1	6	Fernandez, V., Buffetaut, E., Suteethorn, V., Rage, J.C., Tafforeau, P., Kundrát, M. (2015). Evidence of egg diversity in squamate evolution from Cretaceous anguimorph embryos. PloS one 10: p.e0128610.
Ferreira et al. 2018	0	Bruker Skyscan series		17	90	275	0		540		fossil		0					Ferreira, G.S., Iori, F.V., Hermanson, G., Langer, M.C. (2018). New turtle remains from the Late Cretaceous of Monte Alto-SP, Brazil, including cranial osteology, neuroanatomy and phylogenetic position of a new taxon. PalZ. 1-18.
Poinar Jr. et al. 2017	0	GE Vtomex					0				fossil		0		1	1	1	Fontanarrosa, G., Daza, J.D., Abdala, V. (2018). Cretaceous fossil gecko hand reveals a strikingly modern scansorial morphology: Qualitative and biometric analysis of an amber-preserved lizard hand. Cretaceous Res. 84: 120-133.
Fortuny et al. 2016	0			89	120	200	0						0		1	1	1	Fortuny, J., Marcé-Nogué, J., Steyer, J.S., de Esteban-Trivigno, S., Mujal, E., Gil, L. (2016). Comparative 3D analyses and palaeoecology of giant early amphibians (Temnospondyli: Stereospondyli). Sci. Rep. 6: p.30387.
Frýdlová et al. 2017	0			28	70	100	0				skeletal		0					Frýdlová, P., Nutilová, V., Dudák, J., Žemlička, J., Němec, P., Velenský, P., Jirásek, T., Frynta, D. (2017). Patterns of growth in monitor lizards (Varanidae) as revealed by computed tomography of femoral growth plates. Zoomorphology 136: 95-106.
Galiová et al. 2010	0			13			0				fossil		0					Galiová, M., Kaiser, J., Novotný, K., Ivanov, M., Fišáková, M.N., Mancini, L., Tromba, G., Vaculovič, T., Liška, M., Kanický, V. (2010). Investigation of the osteitis deformans phases in snake vertebrae by double-pulse laser-induced breakdown spectroscopy. Anal. Bioanal. Chem. 398: 1095-1107.
Gauthier et al. 2012	0	Bruker Skyscan series					0						0		1319	192	6.86979	Gauthier, J.A., Kearney, M., Maisano, J.A., Rieppel, O., Behlke, A.D. (2012). Assembling the squamate tree of life: perspectives from the phenotype and the fossil record. B. Peabody Mus. Nat. Hist. 53: 3-308.
Gold et al. 2014	0	GE Vtomex		85	207.5	558.25	0						0		48	15	3.2	Gold, M.E.L., Brochu, C.A., Norell, M.A. (2014). An expanded combined evidence approach to the Gavialis problem using geometric morphometric data from crocodylian braincases and Eustachian systems. PloS one 9: p.e105793.
Goutte et al. 2017	0	Nikon XTH series		14.5	130	110	0		1000		preserved/fixed	wrapped in cellophane	1	I	3	3	1	Goutte, S., Mason, M.J., Christensen-Dalsgaard, J., Montealegre-z, F., Chivers, B.D., Sarria-s, F.A., Antoniazzi, M.M., Jared, C., Sato, L.A., Toledo, L.F. (2017). Evidence of auditory insensitivity to vocalization frequencies in two frogs. Sci. Rep. 7: p.12121.
Gower et al. 2016	0	Nikon XTH series		31.5	170	160	0				preserved/fixed		0		3	1	3	Gower, D.J., Wade, E.O., Spawls, S., Böhme, W., Buechley, E.R., Sykes, D., Colston, T.J. (2016). A new large species of Bitis Gray, 1842 (Serpentes: Viperidae) from the Bale Mountains of Ethiopia. Zootaxa 4093: 41-63.
Gower et al. 2010	0	Nikon XTH series		9	103	160	0				preserved/fixed		0		9	2	4.5	Gower, D.J., Wilkinson, M., Sherratt, E., Kok, P.J. (2010). A new species of Rhinatrema Duméril & Bibron (Amphibia: Gymnophiona: Rhinatrematidae) from Guyana. Zootaxa 2391: 47-60.
Greenbaum et al. 2012	0			55			0				preserved/fixed		0		2	1	2	Greenbaum, E., Stanley, E.L., Kusamba, C., Moninga, W.M., Goldberg, S.R., Bursey, C.R. (2012). A new species of Cordylus (Squamata: Cordylidae) from the Marungu Plateau of south-eastern Democratic Republic of the Congo. Afr. J. Herp. 61: 14-39.
Grieco & Richman 2018	0	Scanco μCT		17.2	55	200	1	0.5 Al	850		preserved/fixed		0		5	1	5	Grieco, T.M., Richman, J.M. (2018). Coordination of bilateral tooth replacement in the juvenile gecko is continuous with in ovo patterning. Evol. Develop. 20: 51-64.
Grimaldi et al. 1999	0			60	180	133	0				amber		0					Grimaldi, D., Nguyen, T., Ketcham, R. (2000) Ultra-high-resolution X-ray computed tomography (UHR CT) and the study of fossils in amber. In Studies on Fossils in Amber, with Particular Reference to the Cretaceous of New Jersey, ed. DA Grimaldi, pp. 77–91. Leiden: Backhuys Publ
Gröning et al. 2013	0	Nikon XTH series		121			0				fresh		0		1	1	1	Gröning, F., Jones, M.E., Curtis, N., Herrel, A., O'Higgins, P., Evans, S.E., Fagan, M.J. (2013). The importance of accurate muscle modelling for biomechanical analyses: a case study with a lizard skull. J. R. Soc. Interface 10: 20130216.
Haas et al. 2014	0		W2		30		0				preserved/fixed		1	I	1	1	1	Haas, A., Pohlmeyer, J., McLeod, D. S., Kleinteich, T., Hertwig, S. T., Das, I., Buchholz, D. R. (2014). Extreme tadpoles II: the highly derived larval anatomy of Occidozyga baluensis (Boulenger, 1896), an obligate carnivorous tadpole. Zoomorphology 133: 321-342.
Handrigan & Richman 2010	1						0						0		3	3	1	Handrigan, G.R., Richman, J.M. (2010). Autocrine and paracrine Shh signaling are necessary for tooth morphogenesis, but not tooth replacement in snakes and lizards (Squamata). Dev. Biol. 337: 171-186.
Hawlitschek et al. 2016	0	GE Nanotom			140	80	0			19	preserved/fixed	scanned in a plastic housing using a polystyrene base and braced in position using polystyrene and small wooden struts, with a few ml of alcohol in the bottom of the vessel to achieve air saturation	0		2	1	2	Hawlitschek, O., Scherz, M.D., Straube, N., Glaw, F. (2016). Resurrection of the Comoran fish scale gecko Geckolepis humbloti Vaillant, 1887 reveals a disjunct distribution caused by natural overseas dispersal. Org. Divers. Evol. 16: 289-298.
Hawlitschek et al. 2018	0	GE Nanotom		5.75	120	80	0			30	skeletal		0		9			Hawlitschek, O., Scherz, M.D., Ruthensteiner, B., Crottini, A., Glaw, F. (2018) Computational molecular species delimitation and taxonomic revision of the gecko genus Ebenavia Boettger, 1878. Sci. Nat. 105:49.
Heinicke et al. 2015	0	GE Vtomex		30			0				preserved/fixed		0		1	1	1	Heinicke, M.P., Barrio-Amoros, C.L., Hedges, S.B. (2015). Molecular and morphological data support recognition of a new genus of New World direct-developing frog (Anura: Terrarana) from an under-sampled region of South America. Zootaxa 3986: 151-172.
Heinicke et al. 2009	0	Varian Omni-X		40			0				preserved/fixed		0		0	0		Heinicke, M.P., Duellman, W.E., Trueb, L., Means, D.B., MacCulloch, R.D., Hedges, S.B. (2009). A new frog family (Anura: Terrarana) from South America and an expanded direct-developing clade revealed by molecular phylogeny. Zootaxa 2211: 1-35.
Heiss et al. 2016	0	Bruker Skyscan series		7.39			0				preserved/fixed	mounted in Falcon tubes again in absolute ethanol	1	I	10	2	5	Heiss, E., Handschuh, S., Aerts, P., Van Wassenbergh, S. (2016). Musculoskeletal architecture of the prey capture apparatus in salamandrid newts with multiphasic lifestyle: does anatomy change during the seasonal habitat switches?. J. Anat. 228: 757-770.
Heiss et al. 2017	0	Bruker Skyscan series, Zeiss Xradia MicroXCT		5.97	45		0				preserved/fixed	mounted in Falcon tubes in absolute ethanol	1	I	20	2	10	Heiss, E., Handschuh, S., Aerts, P., Van Wassenbergh, S. (2017). A tongue for all seasons: extreme phenotypic flexibility in salamandrid newts. Sci. Rep. 7: p.1006.
Herrel et al. 2013	0	Viscom system	SYRMEP	22.35	93	515	0				preserved/fixed		0		4	4	1	Herrel, A., Tolley, K.A., Measey, G.J., da Silva, J.M., Potgieter, D.F., Boller, E., Boistel, R., Vanhooydonck, B. (2013). Slow but tenacious: an analysis of running and gripping performance in chameleons. J. Exp. Biol. 216: 1025-1030.
Holliday et al. 2010	0	GE eXplore Locus		45			0				preserved/fixed		0		11	9	1.22222	Holliday, C.M., Gardner, N.M., Paesani, S.M., Douthitt, M., Ratliff, J.L. (2010). Microanatomy of the mandibular symphysis in lizards: patterns in fiber orientation and Meckel's cartilage and their significance in cranial evolution. Anat. Rec. 293: 1350-1359.
Holliday et al. 2013	0	Siemens Inveon		83	50	500	0				preserved/fixed		1	I	1	1	1	Holliday, C.M., Tsai, H.P., Skiljan, R.J., George, I.D., Pathan, S. (2013). A 3D interactive model and atlas of the jaw musculature of Alligator mississippiensis. PLoS one 8: p.e62806.
Holmes et al. 2010	0	Bruker Skyscan series					0				fossil		0					Holmes, R.B., Murray, A.M., Chatrath, P., Attia, Y.S., Simons, E.L. (2010). Agamid lizard (Agamidae: Uromastycinae) from the lower Oligocene of Egypt. Hist. Biol. 22: 215-223.
Houssaye et al. 2013	0	GE Vtomex, Viscom system, Bruker Skyscan series	ID19	15.95			0						0		38	38	1	Houssaye, A., Boistel, R., Böhme, W., Herrel, A. (2013). Jack-of-all-trades master of all? Snake vertebrae have a generalist inner organization. Naturwissenschaften 100: 997-1006.
Houssaye et al. 2010	0	Viscom system		19.88			0						0		11	9	1.22222	Houssaye, A., Mazurier, A., Herrel, A., Volpato, V., Tafforeau, P., Boistel, R., De Buffrénil, V. (2010). Vertebral microanatomy in squamates: structure, growth and ecological correlates. J. Anat. 217: 715-727.
Ivanovic et al. 2013	0	Bruker Skyscan series		26.1	74		1	none	515				0		7	2	3.5	Ivanovic, A., Aljancic, G., Arntzen, J.W. (2013). Skull shape differentiation of black and white olms (Proteus anguinus anguinus and Proteus a. parkelj) an exploratory analysis with micro-CT scanning. Contributions Zool. 82: 107-114.
Ivanovic & Arntzen 2018	0	Bruker Skyscan series		26.1	59		1	none	145				0		759	56	13.5536	Ivanović, A., Arntzen, J.W. (2018). Evolution of skull shape in the family Salamandridae (Amphibia: Caudata). J. Anat. 232: 359-370.
Jayne et al. 2018	0						0				preserved/fixed		0		4	4	1	Jayne, B.C., Voris, H.K., Ng, P.K. (2018). How big is too big? Using crustacean-eating snakes (Homalopsidae) to test how anatomy and behaviour affect prey size and feeding performance. Biol. J. Linn. Soc. 123: 636-650.
Johnston 2010	1						0						0					Johnston, P. (2010). The constrictor dorsalis musculature and basipterygoid articulation in Sphenodon. J. Morph. 271: 280-292.
Jonasson et al. 2012	0	Scanco vivaCT		25			0				preserved/fixed + fresh		0		3	2	1.5	Jonasson, K.A., Russell, A.P., Vickaryous, M.K. (2012). Histology and histochemistry of the gekkotan notochord and their bearing on the development of notochordal cartilage. J. Morph. 273: 596-603.
Jones et al. 2013	0	Nikon XTH series		30.05	80	21	1	0.1 Cu			fossil		0		2			Jones, M.E., Anderson, C.L., Hipsley, C.A., Müller, J., Evans, S.E., Schoch, R.R. (2013). Integration of molecules and new fossils supports a Triassic origin for Lepidosauria (lizards, snakes, and tuatara). BMC Evol. Biol. 13: 208.
Jones et al. 2017	0	Nikon XTH series		110	113	25	1	0.1 Cu			skull		0		1	1	1	Jones, M.E., Gröning, F., Dutel, H., Sharp, A., Fagan, M.J., Evans, S.E. (2017). The biomechanical role of the chondrocranium and sutures in a lizard cranium. J. R. Soc. Interface 14: 20170637.
Jones et al. 2018	0	Bruker Skyscan series			100	240	1	0.5 Al			skeletal	held in place using a specially cut piece of polystyrene	0		2	2	1	Jones, M.E., Lucas, P.W., Tucker, A.S., Watson, A.P., Sertich, J.J., Foster, J.R., Williams, R., Garbe, U., Bevitt, J.J., Salvemini, F. (2018). Neutron scanning reveals unexpected complexity in the enamel thickness of an herbivorous Jurassic reptile. J. R. Soc. Interface 15: 20180039.
Jones et al. 2012	0	Nikon XTH series			93	17	1	0.1 Cu			skeletal		0		1	1	1	Jones, M.E., O'higgins, P., Fagan, M.J., Evans, S.E., Curtis, N. (2012). Shearing mechanics and the influence of a flexible symphysis during oral food processing in Sphenodon (Lepidosauria: Rhynchocephalia). Anat. Rec. 295: 1075-1091.
Jones et al. 2012	0	Nikon XTH series		101			1	0.1 Cu					0		2	2	1	Jones, M.E., Werneburg, I., Curtis, N., Penrose, R., O’Higgins, P., Fagan, M.J., Evans, S.E. (2012). The head and neck anatomy of sea turtles (Cryptodira: Chelonioidea) and skull shape in Testudines. PloS one 7: e47852.
Jones et al. 2009	1						0						0					Jones, M.E.H., Curtis, N., O'Higgins, P., Fagan, M.J., Evans, S.E. (2009). The head and neck muscles associated with feeding in Sphenodon (Reptilia: Lepidosauria: Rhynchocephalia). Palaeontol. Electron. 12: 12.2.7A.
Kazi et al. 2018	0	GE Nanotom		10	82.5	185	0		750		preserved/fixed		0		41	17	2.41176	Kazi, S., Hipsley, C.A. (2018). Conserved evolution of skull shape in Caribbean head-first burrowing worm lizards (Squamata: Amphisbaenia). Biol. J. Linn. Soc. bly086, https://doi.org/10.1093/biolinnean/bly086
Kearney et al. 2005	0				150	160	1	none			fossil		0		1	1	1	Kearney, M., Maisano, J.A., Rowe, T. (2005). Cranial anatomy of the extinct amphisbaenian Rhineura hatcherii (Squamata, Amphisbaenia) based on high‐resolution X‐ray computed tomography. J. Morph. 264: 1-33.
Klages et al. 2013	0	GE Nanotom		8.5	180		0				preserved/fixed		0					Klages JO, Glaw FR, Köhler JÖ, Müller JO, Hipsley CA, Vences M. (2013). Molecular, morphological and osteological differentiation of a new species of microhylid frog of the genus Stumpffia from northwestern Madagascar. Zootaxa 3717: 280-300.
Kleinteich & Gorb 2016	1	Bruker Skyscan series		0.9	40	250	0					placed into the tips of pipettes that were filled with distilled water; pipette tips wrapped with laboratory film	1	I	11	10	1.1	Kleinteich, T. and Gorb, S.N., 2016. Frog tongue surface microstructures: functional and evolutionary patterns. Beilstein journal of nanotechnology, 7, 893-903
Kleinteich & Gorb 2015	0	Bruker Skyscan series			70	190	0				fresh	in distilled water, frogs in plastic containers, tongues in Falcon Tubes, pieces in water-filled pipettes and wrappped with parafilm	1	I		1		Kleinteich, T., Gorb, S.N. (2015). Frog tongue acts as muscle-powered adhesive tape. R. Soc. Open Sci. 2: p.150333.
Kleinteich & Gorb 2017	1						0						1	I	10	9	1.11111	Kleinteich, T., Gorb, S.N. (2017). Comparative study of tongue surface microstructure and its possible functional significance in frogs. In Functional Surfaces in Biology III (pp. 205-220). Springer, Cham.
Kleinteich et al. 2008	0		W2	8.015			0				f dried		0		3	3	1	Kleinteich, T., Haas, A., Summers, A.P. (2008). Caecilian jaw-closing mechanics: integrating two muscle systems. J. R. Soc. Interface 5: 1491-1504.
Klembara et al. 2016	0	GE Nanotom		15	120	80	0	none	500				0		11	1	11	Klembara, J., Dobiašová, K., Hain, M., Yaryhin, O. (2017). Skull anatomy and ontogeny of legless lizard Pseudopus apodus (Pallas, 1775). heterochronic influences on form. Anat. Rec. 300: 460-502.
Klenner et al. 2016	1						0						0		1	1	1	Klenner, S., Witzel, U., Paris, F., Distler, C. (2016). Structure and function of the septum nasi and the underlying tension chord in crocodylians. J. Anat. 228: 113-124.
Kley 2006	0						0						0		1	1	1	Kley, N.J. (2006). Morphology of the lower jaw and suspensorium in the Texas blindsnake, Leptotyphlops dulcis (Scolecophidia: Leptotyphlopidae). J. Morph. 267: 494-515.
Koch & Venegas 2016	0	Bruker Skyscan series					0				preserved/fixed		0					Koch, C., Venegas, P.J. (2016). A large and unusually colored new snake species of the genus Tantilla (Squamata; Colubridae) from the Peruvian Andes. PeerJ 4: p.e2767.
Krings et al. 2017	0	Bruker Skyscan series		6.15	55		0				preserved/fixed		0		5	5	1	Krings, M., Klein, B., Heneka, M. J., Rödder, D. (2017). Morphological comparison of five species of poison dart frogs of the genus Ranitomeya (Anura: Dendrobatidae) including the skeleton, the muscle system and inner organs. PloS one 12: e0171669.
Kucharzewski et al. 2014	0	GE Nanotom			120	115	0			21	preserved/fixed		0		3	1	3	Kucharzewski, C., Raselimanana, A.P., Wang, C., Glaw, F. (2014). A taxonomic mystery for more than 150 years: Identity, systematic position and Malagasy origin of the snake Elapotinus picteti Jan, 1862, and synonymy of Exallodontophis Cadle, 1999 (Serpentes: Lamprophiidae). Zootaxa 3852: 179-202.
Kuehnel et al. 2012	0		W2				0				preserved/fixed	freeze-dried, attached to a metal specimen holder with two-component adhesive and clamped vertically in the X-ray machine.			1	1	1	Kuehnel, S., Herzen, J., Kleinteich, T., Beckmann, F., Kupfer, A. (2012). The female cloaca of an oviparous caecilian amphibian (Gymnophiona). functional and seasonal aspects. Acta Zool. 9: 208-221.
Kumar et al. 2012	0	Bruker Skyscan series		18	65	129	0						0		1	1	1	Kumar, A.B., Sanders, K.L., George, S., Murphy, J.C. (2012). The status of Eurostus dussumierii and Hypsirhina chinensis (Reptilia, Squamata, Serpentes). with comments on the origin of salt tolerance in homalopsid snakes. Syst. Biodiv. 10: 479-489.
Kurosaka et al. 2008	0	LaTheta LTC					0				fresh	kept moist with wet paper towels	0			1		Kurosaka, H., Takano‐Yamamoto, T., Yamashiro, T., Agata, K. (2008). Comparison of molecular and cellular events during lower jaw regeneration of newt (Cynops pyrrhogaster) and West African clawed frog (Xenopus tropicalis). Dev. Dyn. 237: 354-365.
Laduke et al. 2010	0					133	0				fossil		0		1	1	1	Laduke, T.C., Krause, D.W., Scanlon, J.D., Kley, N.J. (2010). A Late Cretaceous (Maastrichtian) snake assemblage from the Maevarano Formation, Mahajanga Basin, Madagascar. J. Vert. Paleontol. 30: 109-138.
Lambert et al. 2017	0	GE Nanotom			140	80	1	0.1 Cu	750	30	preserved/fixed		0					Lambert, S.M., Hutter, C.R., Scherz, M.D. (2017). Diamond in the rough: a new species of fossorial diamond frog (Rhombophryne) from Ranomafana National Park, southeastern Madagascar. Zoosyst. Evol. 93: 143.
Lauridsen et al. 2014	0	Scanco µCT		15	55	116	0				preserved/fixed		1	I	1	1	1	Lauridsen, H., Da Silva, M.A.O., Hansen, K., Jensen, H.M., Warming, M., Wang, T., Pedersen, M. (2014). Ultrasound imaging of the anterior section of the eye of five different snake species. BMC Vet. Res. 10: 313.
Le et al. 2015	0	Comscan ScanXmate		52	80	100	0						0		3	3	1	Le, D.T., Nguyen, T.T., Nishikawa, K., Nguyen, S.L.H., Pham, A.V., Matsui, M., Bernardes, M., Nguyen, T.Q. (2015). A new species of Tylototriton Anderson, 1871 (Amphibia: Salamandridae) from northern Indochina. Curr. Herpetol. 34: 38-50.
Lintner et al. 2012	0	GE Nanotom		6			0				preserved/fixed		0		2	1	2	Lintner, M., Weissenbacher, A., Heiss, E. (2012). The oropharyngeal morphology in the semiaquatic giant Asian pond turtle, Heosemys grandis, and its evolutionary implications. PloS one 7: p.e46344.
Lipka et al. 2006 2006	0						0				fossil		0		1	1	1	Lipka, T.R., Therrien, F., Weishampel, D.B., Jamniczky, H.A., Joyce, W.G., Colbert, M.W., Brinkman, D.B. (2006). A new turtle from the Arundel Clay facies (Potomac Formation, Early Cretaceous) of Maryland, USA. J. Vert. Paleontol. 26: 300-307.
Liu et al. 2016	0	Scanco μCT			70		0				skeletal		0		4	4	1	Liu, M., Reed, D.A., Cecchini, G.M., Lu, X., Ganjawalla, K., Gonzales, C.S., Monahan, R., Luan, X., Diekwisch, T.G. (2016). Varanoid tooth eruption and implantation modes in a late cretaceous mosasaur. Front. Physiol. 7: 145.
Lukanov et al. 2016	0	Zeiss Xradia MicroXCT		27.87		66	0				preserved/fixed	plastic tube w 70EHOH	0		3	2	1.5	Lukanov, S., Tzankov, N., Handschuh, S., Heiss, E., Naumov, B., Natchev, N. (2016). On the amphibious food uptake and prey manipulation behavior in the Balkan-Anatolian crested newt (Triturus ivanbureschi, Arntzen and Wielstra, 2013). Zoology 119: 224-231.
Maddin & Anderson 2012	0	Scanco μCT, Bruker Skyscan series		16	55	72	0				preserved/fixed		0		11	11	1	Maddin, H.C., Anderson, J.S. (2012). Evolution of the amphibian ear with implications for lissamphibian phylogeny: insight gained from the caecilian inner ear. Fieldiana Life Earth Sci. 5: 59-76.
Maddin et al. 2012	0	Bruker Skyscan series		16.8	145	85	0				fossil		0		2	1	2	Maddin, H.C., Jenkins Jr, F.A., Anderson, J.S. (2012). The braincase of Eocaecilia micropodia (Lissamphibia, Gymnophiona) and the origin of caecilians. PLoS one 7: p.e50743.
Maddin et al. 2012	1	Scanco µCT, Bruker Skyscan series		13.875	67.5	66	0						0		99	46	2.15217	Maddin, H.C., Russell, A.P., Anderson, J.S. (2012). Phylogenetic implications of the morphology of the braincase of caecilian amphibians (Gymnophiona). Zool. J. Linnean Soc. 166: 160-201.
Mahler & Kearney 2006	1						0						0					Mahler, D.L., Kearney, M. (2006). The palatal dentition in squamate reptiles: morphology, development, attachment, and replacement. Fieldiana Zool. 108: 1-61.
Anderson Maisano et al. 2006	0				180	133	1	none			fossil		0		1	1	1	Maisano, J.A., Kearney, M., Rowe, T. (2006). Cranial anatomy of the spade‐headed amphisbaenian Diplometopon zarudnyi (Squamata, amphisbaenia) based on high‐resolution X‐ray computed tomography. J. Morph. 267: 70-102.
Anderson Maisano & Rieppel 2007	0			8.3	180	533	1	none			preserved/fixed		0		1	1	1	Maisano, J.A., Rieppel, O. (2007). The skull of the round Island boa, Casarea dussumieri Schlegel, based on high‐resolution X‐ray computed tomography. J. Morph. 268: 371-384.
Matthews & du Plessis 2016	0	GE Vtomex, GE Nanotom			60	240	0			20	fossil + preserved/fixed		0					Matthews, T., du Plessis, A. (2016). Using X-ray computed tomography analysis tools to compare the skeletal element morphology of fossil and modern frog (Anura) species. Palaeontol. Electron. 19: 19.1.1T.
McCurry et al. 2017	1						0						0					McCurry, M.R., Evans, A.R., Fitzgerald, E.M., Adams, J.W., Clausen, P.D., McHenry, C.R. (2017). The remarkable convergence of skull shape in crocodilians and toothed whales. Proc. R. Soc. B. 284: 20162348.
McCurry et al. 2015	1						0						0		5	5	1	McCurry, M.R., Evans, A.R., McHenry, C.R. (2015). The sensitivity of biological finite element models to the resolution of surface geometry: a case study of crocodilian crania. PeerJ 3: p.e988.
McCurry et al. 2015	1	Zeiss Xradia MicroXCT					0				skeletal		0		10	10	1	McCurry, M.R., Mahony, M., Clausen, P.D., Quayle, M.R., Walmsley, C.W., Jessop, T.S., Wroe, S., Richards, H., McHenry, C.R. (2015). The relationship between cranial structure, biomechanical performance and ecological diversity in varanoid lizards. PloS one 10: p.e0130625.
McCurry et al. 2017	0						0						0					McCurry, M.R., Walmsley, C.W., Fitzgerald, E.M.G., McHenry, C.R. (2017). The biomechanical consequences of longirostry in crocodilians and odontocetes. J. biomech. 56: 61-70.
Means et al. 2017	0	GE Vtomex		12.7			0						0		11	2	5.5	Means, D.B., Lamb, J.Y., Bernardo, J. (2017). A new species of dusky salamander (Amphibia: Plethodontidae: Desmognathus) from the Eastern Gulf Coastal Plain of the United States and a redescription of D. auriculatus. Zootaxa 4263: 467-506.
Melstrom 2017	1	Siemens Inveon		35	80	150	0				skeletal		0		45	45	1	Melstrom, K.M. (2017). The relationship between diet and tooth complexity in living dentigerous saurians. J. Morph. 278: 500-522.
Metzger et al. 2005	1					160	0						0		1	1	1	Metzger, K.A., Daniel, W.J., Ross, C.F. (2005). Comparison of beam theory and finite‐element analysis with in vivo bone strain data from the alligator cranium. Anat. Rec. 283: 331-348.
Moazen et al. 2012	0			36	45	88	0		800	120	dried		0		1	1	1	Moazen, M., Costantini, D., Bruner, E. (2013). A Sensitivity Analysis to the Role of the Fronto‐Parietal Suture in Lacerta Bilineata: A Preliminary Finite Element Study. Anat. Rec. 296: 198-209.
Moazen et al. 2008	1						0						0		1	1	1	Moazen, M., Curtis, N., Evans, S.E., O’Higgins, P., Fagan, M.J. (2008). Combined finite element and multibody dynamics analysis of biting in a Uromastyx hardwickii lizard skull. J. Anat. 213: 499-508.
Moazen et al. 2009	1						0						0		1	1	1	Moazen, M., Curtis, N., Evans, S.E., O’Higgins, P., Fagan, M.J. (2008). Rigid-body analysis of a lizard skull: modelling the skull of Uromastyx hardwickii. J. Biomech. 41: 1274-1280.
Moazen et al. 2009	1						0						0		1	1	1	Moazen, M., Curtis, N., O'Higgins, P., Jones, M.E., Evans, S.E., Fagan, M.J. (2009). Assessment of the role of sutures in a lizard skull: a computer modelling study. Proc. R. Soc. B: Biol. Sci. 276: 39-46.
Molnar et al. 2017	0	Scanco µCT			70	114	1	none			preserved/fixed		1	PTA				Molnar, J.L., Diaz, R.E., Skorka, T., Dagliyan, G., Diogo, R. (2017). Comparative musculoskeletal anatomy of chameleon limbs, with implications for the evolution of arboreal locomotion in lizards and for teratology. J. Morph. 278: 1241-1261.
Montero et al. 2017	0	Zeiss Xradia MicroXCT, GE Vtomex					0				preserved/fixed		1	I	5	5	1	Montero, R., Daza, J.D., Bauer, A.M., Abdala, V. (2017). How common are cranial sesamoids among squamates?. J. Morph. 278: 1400-1411.
Moustakas-Verho 2014	0	GE Nanotom		5	80	180	0		500				1	PTA		1		Moustakas-Verho, J.E., Zimm, R., Cebra-Thomas, J., Lempiäinen, N.K., Kallonen, A., Mitchell, K.L., Hämäläinen, K., Jernvall, J., Gilbert, S.F. (2014). The origin and loss of periodic patterning in the turtle shell. Development 141: 3033-3039.
Müller et al. 2011	0						0				fossil		0		1	1	1	Müller, J., Hipsley, C.A., Head, J.J., Kardjilov, N., Hilger, A., Wuttke, M., Reisz, R.R. (2011). Eocene lizard from Germany reveals amphisbaenian origins. Nature 473: 364.
Muller et al. 2016	1			21	180	133	1	none			fossil		0		2	2	1	Müller, J., Hipsley, C.A., Maisano, J.A. (2016). Skull osteology of the Eocene amphisbaenian Spathorhynchus fossorium (Reptilia, Squamata) suggests convergent evolution and reversals of fossorial adaptations in worm lizards. J. Anat. 229: 615-630.
Muller et al. 2018	0	GE Nanotom		4.7	90	100	0		750		fossil		0					Müller, J., Roberts, E., Naylor, E., Stevens, N. (2018). A Fossil Gekkotan (Squamata) from the Late Oligocene Nsungwe Formation, Rukwa Rift Basin, Tanzania. J. Herp. 52: 223-227.
Nakajima et al. 2014	0	GE Vtomex, LaTHeta LCT		201	115	590	0				skeletal		0		52	52	1	Nakajima, Y., Hirayama, R., Endo, H. (2014). Turtle humeral microanatomy and its relationship to lifestyle. Biol. J. Linn. Soc. 112: 719-734.
Nance 2007	0				110	255	0				preserved/fixed	in plastic cylinder	0		2	1	2	Nance, H.A. (2007). Cranial osteology of the African gerrhosaurid Angolosaurus skoogi (Squamata; Gerrhosauridae). Afr. J. Herp. 56: 39-75.
Natchev et al. 2016	0	Scanco µCT			70	114	0				preserved/fixed	mounted in 70% ethanol	0		2	1	2	Natchev, N., Handschuh, S., Lukanov, S., Tzankov, N., Naumov, B., Werneburg, I. (2016). Contributions to the functional morphology of caudate skulls: kinetic and akinetic forms. PeerJ 4: p.e2392.
Natchev et al. 2015	0	Scanco µCT		3.5		114	0					was mounted in a plastic tube in 70% ethanol	0		1	1	1	Natchev, N., Tzankov, N., Vergilov, V., Kummer, S., Handschuh, S. (2015). Functional morphology of a highly specialised pivot joint in the cranio-cervical complex of the minute lizard Ablepharus kitaibelii in relation to feeding ecology and behaviour. Contrib. Zool. 84: 13-23.
Naumann & Olsson 2017	0	GE Nanotom					0				preserved/fixed		1	PTA	1	1	1	Naumann, B., Olsson, L. (2018). Three‐dimensional reconstruction of the cranial and anterior spinal nerves in early tadpoles of Xenopus laevis (Pipidae, Anura). J. Comp. Neurol. 526: 836-857.
Oliviera et al. 2018	0	Bruker Skyscan series		9			0						0					Oliviera, E.C., Vaz-Silva, W., Santos-Jr, A.P., Graboski, R., Teixeira, M.J., Dal Vechio, F., Ribeiro, S. (2018). A new four-pored Amphisbaena Linnaeus, 1758 (Amphisbaenia, Amphisbaenidae) from Brazilian Amazon. Zootaxa 4420: 451-474.
Ollonen et al. 2018	1	Bruker Skyscan series, GE Nanotom		6	70	145.5	1	0.25 - 1 Al					1	PTA	113	113	1	Ollonen, J., Da Silva, F.O., Mahlow, K., Di-Poï, N. (2018). Skull Development, Ossification Pattern, and Adult Shape in the Emerging Lizard Model Organism Pogona vitticeps: A comparative analysis with other squamates. Front. Physiol 9: 278.
Olori 2010	0						0				dried		0		1	1	1	Olori, J.C. (2010). Digital endocasts of the cranial cavity and osseous labyrinth of the burrowing snake Uropeltis woodmasoni (Alethinophidia: Uropeltidae). Copeia 2010: 14-26.
Olori & Bell 2012	0						0						0		1	1	1	Olori, J.C., Bell, C.J. (2012). Comparative skull morphology of uropeltid snakes (Alethinophidia: Uropeltidae) with special reference to disarticulated elements and variation. PLoS one 7: p.e32450.
Ord et al 2015	1						0						0					Ord, T.J., Klomp, D.A., Garcia‐Porta, J., Hagman, M. (2015). Repeated evolution of exaggerated dewlaps and other throat morphology in lizards. J. Evol. Biol. 28: 1948-1964.
Palci & Caldwell 2014	1	Bruker Skyscan series					0						0		4	4	1	Palci, A., Caldwell, M.W. (2014). The upper cretaceous snake Dinilysia patagonica Smith‐Woodward, 1901, and the crista circumfenestralis of snakes. J. Morph. 275: 1187-1200.
Palci et al. 2017	1	Bruker Skyscan series					0						0		81	81	1	Palci, A., Hutchinson, M.N., Caldwell, M.W., Lee, M.S. (2017). The morphology of the inner ear of squamate reptiles and its bearing on the origin of snakes. R. Soc. Open Sci. 4: p.170685.
Palci et al. 2018	1	Bruker Skyscan series					0						0		83	83	1	Palci, A., Hutchinson, M.N., Caldwell, M.W., Scanlon, J.D., Lee, M.S. (2018). Palaeoecological inferences for the fossil Australian snakes Yurlunggur and Wonambi (Serpentes, Madtsoiidae). R. Soc. Open Sci. 5: 172012.
Palci et al. 2016	0	Bruker Skyscan series		12.975	53.5	134.5	1	0.5 Al					0		14	7	2	Palci, A., Lee, M.S., Hutchinson, M.N. (2016). Patterns of postnatal ontogeny of the skull and lower jaw of snakes as revealed by micro‐CT scan data and three‐dimensional geometric morphometrics. J. Anat. 229: 723-754.
Paluh et al. 2017	0	Zeiss Xradia MicroXCT		31	135	191.5	0		2000		preserved/fixed		0		4	4	1	Paluh, D.J., Griffing, A.H., Bauer, A.M. (2017). Sheddable armour: identification of osteoderms in the integument of Geckolepis maculata (Gekkota). Afr. J. Herp. 66: 12-24.
Pardo et al. 2017	0	GE eXplore Locus		38.9	100	60	0				fossil		0		2	1	2	Pardo, J.D., Small, B.J., Huttenlocker, A.K. (2017). Stem caecilian from the Triassic of Colorado sheds light on the origins of Lissamphibia. Proc. Natl. Acad. Sci. 114: E5389-E5395.
Parra-Olea et al. 2016	0						0						0		5	5	1	Parra-Olea, G., Rovito, S.M., García-París, M., Maisano, J.A., Wake, D.B., Hanken, J. (2016). Biology of tiny animals: three new species of minute salamanders (Plethodontidae: Thorius) from Oaxaca, Mexico. PeerJ 4: p.e2694.
Pinto et al. 2015	0	Bruker Skyscan series			40		0						0		1	1	1	Pinto, R.R., Martins, A.R., Curcio, F., Ramos, L.D.O. (2015). Osteology and cartilaginous elements of Trilepida salgueiroi (Amaral, 1954) (Scolecophidia: Leptotyphlopidae). Anat. Rec. 298: 1722-1747.
Fontanarrosa et al. 2018	0	Scanco μCT		15	55	145	0		200		amber		0		1	1	1	Poinar Jr, G., Philbrick, K.A., Cohn, M.J., Turner, R.T., Iwaniec, U.T., Wunderlich, J. (2017). X-ray microcomputed tomography reveals putative trematode metacercaria in a 100 million year-old lizard (Squamata: Agamidae). Cretaceous Res. 80: 27-30.
Polcyn et al. 2005	0				150	200	0				fossil		0		1	1	1	Polcyn, M.J., Jacobs, L.L., Haber, A. (2005). A morphological model and CT assessment of the skull of Pachyrhachis problematicus (Squamata, Serpentes), a 98 million year old snake with legs from the Middle East. Palaeontol. Electron. 8: 1-24.
Polcyn et al. 2002	0				80	200	1	none			amber		0		1	1	1	Polcyn, M.J., Rogers, J.V., Kobayashi, Y., Jacobs, L.L. (2002). Computed tomography of an Anolis lizard in Dominican amber: systematic, taphonomic, biogeographic, and evolutionary implications. Palaeontol. Electronica 5: 1-13.
Pollard et al. 2016	0	Bruker Skyscan series		2	40	250	1	0.5 Al	1600		preserved/fixed		0			1		Pollard, A.S., Boyd, S., McGonnell, I.M., Pitsillides, A.A. (2017). The role of embryo movement in the development of the furcula. J. Anat. 230: 435-443.
Pollard et al. 2017	0	Bruker Skyscan series		5	40	250	1	0.5 Al	1600		preserved/fixed		1	PTA	3	1	3	Pollard, A.S., Charlton, B.G., Hutchinson, J.R., Gustafsson, T., McGonnell, I.M., Timmons, J.A., Pitsillides, A.A. (2017). Limb proportions show developmental plasticity in response to embryo movement. Sci. Rep. 7: p.41926.
Polly et al. 2016	1						0						0		1	1	1	Polly, P.D., Stayton, C.T., Dumont, E.R., Pierce, S.E., Rayfield, E.J., Angielczyk, K.D. (2016). Combining geometric morphometrics and finite element analysis with evolutionary modeling: towards a synthesis. J. Vert. Paleontol. 36: p.e1111225.
Porro et al. 2017	0	Nikon XTH series		49	65	340	0						0		1	1	1	Porro, L.B., Collings, A.J., Eberhard, E.A., Chadwick, K.P., Richards, C.T. (2017). Inverse dynamic modelling of jumping in the red-legged running frog Kassina maculata. J. Exp. Biol. jeb.155416 doi: 10.1242/jeb.155416.
Porro & Richards 2017	0	Nikon XTH series		33	68.5	320	1	none			preserved/fixed		1	I	3	2	1.5	Porro, L.B., Richards, C.T. (2017). Digital dissection of the model organism Xenopus laevis using contrast‐enhanced computed tomography. J. Anat. 231: 169-191.
Porter et al. 2016	0	GE eXplore Locus		67.5	80	450	0						1	Ba	9	1	9	Porter, W.R., Sedlmayr, J.C., Witmer, L.M. (2016). Vascular patterns in the heads of crocodilians: blood vessels and sites of thermal exchange. J. Anat. 229: 800-824.
Ruger Porter & Witmer 2015	0	GE eXplore Locus		67.5	80	450	0				fresh		1	DCDVI	5	1	5	Porter, W.R., Witmer, L.M. (2015). Vascular patterns in iguanas and other squamates: blood vessels and sites of thermal exchange. PloS one 10: p.e0139215.
Poyarkov Jr et al. 2018	0	Bruker Skyscan series		3.7		100	0				preserved/fixed	The specimen was mounted on a polystyrene baseplate and placed inside a hermetically sealed polyethylene vessel	0		1	1	1	Poyarkov Jr, N.A., Suwannapoom, C., Pawangkhanant, P., Aksornneam, A., Van Duong, T., Korost, D.V., Che, J. (2018). A new genus and three new species of miniaturized microhylid frogs from Indochina (Amphibia: Anura: Microhylidae: Asterophryinae). Zool. Res. 39: 130.
Preininger et al. 2016	0	Scanco µCT		8		114	0				preserved/fixed	mounted in plastic tubes filled with absolute ethanol	0		6	1	6	Preininger, D., Handschuh, S., Boeckle, M., Sztatecsny, M., Hödl, W. (2016). Comparison of female and male vocalisation and larynx morphology in the size dimorphic foot-flagging frog species Staurois guttatus. Herpetol. J. 26: 187-197.
Pritchard et al. 2014	0	Zeiss Xradia MicroXCT		6.58	75	114	1	0.7 SiO2			fossil		0		6	2	3	Pritchard, A.C., McCartney, J.A., Krause, D.W., Kley, N.J. (2014). New snakes from the Upper Cretaceous (Maastrichtian) Maevarano Formation, Mahajanga Basin, Madagascar. J. Vert. Paleontol. 34: 1080-1093.
Prötzel et al. 2018	0	GE Nanotom			125.5	65	0		500	31.5			0		70	31	2.25806	Prötzel, D., Heß, M., Scherz, M.D., Schwager, M., van’t Padje, A., Glaw, F. (2018). Widespread bone-based fluorescence in chameleons. Sci. Rep. 8: 698.
Prötzel et al. 2015	0	GE Nanotom			95	206.667	0			37	preserved/fixed	specimens were placed in a closed plastic vessel slightly larger than the specimen with the head oriented upwards, and stabilized with ethanol soaked paper	1	I	17	2	8.5	Prötzel, D., Ruthensteiner, B., Scherz, M.D., Glaw, F. (2015). Systematic revision of the Malagasy chameleons Calumma boettgeri and C. linotum (Squamata: Chamaeleonidae). Zootaxa 4048: 211-231.
Prötzel et al. 2018	1	GE Nanotom			95	160	0		1000	29		closed plastic vessel slightly larger then specimen, head upwards and stabilized with ethanol soaked paper	1	I	36	14	2.57143	Prötzel, D., Vences, M., Hawlitschek, O., Scherz, M.D., Ratsoavina, F.M., Glaw, F. (2018). Endangered beauties: micro-CT cranial osteology, molecular genetics and external morphology reveal three new species of chameleons in the Calumma boettgeri complex (Squamata: Chamaeleonidae). Zool. J. Linn. Soc. zlx112, https://doi.org/10.1093/zoolinnean/zlx112.
Prötzel et al. 2017	0	GE Nanotom		67.5	130	80	0			29	preserved/fixed	mounted vertically in a closed plastic vessel slightly larger than the specimen with the head oriented upwards, and stabilized with ethanol soaked paper	0		7	1	7	Prötzel, D., Vences, M., Scherz, M.D., Vieites, D.R., Glaw, F. (2017). Splitting and lumping: An integrative taxonomic assess-ment of Malagasy chameleons in the Calumma guibei complex results in the new species C. gehringi sp. nov. Vertebr. Zool. 67: 231-249.
Rakotoarison et al. 2017	0	GE Nanotom			140	80	0		750	30	preserved/fixed		0		2	2	1	Rakotoarison, A., Scherz, M.D., Glaw, F., Vences, M. (2017). Rediscovery of frogs belonging to the enigmatic microhylid genus Madecassophryne in the Anosy Massif, south-eastern Madagascar. Salamandra 53: 507-518.
Regnault et al. 2017	1	Nikon XTH series					0						0					Regnault, S., Hutchinson, J.R., Jones, M.E. (2017). Sesamoid bones in tuatara (Sphenodon punctatus) investigated with X‐ray microtomography, and implications for sesamoid evolution in Lepidosauria. J. Morph. 278: 62-72.
Regnault et al. 2016	0	Nikon XTH series, Bruker Skyscan series		67.125	80.5	359.25	0		2300		preserved/fixed		0		35	16	2.1875	Regnault, S., Jones, M.E., Pitsillides, A.A., Hutchinson, J.R. (2016). Anatomy, morphology and evolution of the patella in squamate lizards and tuatara (Sphenodon punctatus). J. Anat. 228: 864-876.
Reilly & Jorgensen 2011	0	GE eXplore Locus					0						0		33	33	1	Reilly, S.M., Jorgensen, M.E. (2011). The evolution of jumping in frogs: morphological evidence for the basal anuran locomotor condition and the radiation of locomotor systems in crown group anurans. J. Morph. 272: 149-168.
Ribeiro et al. 2017	0	GE Vtomex		9.5	60	175	0				preserved/fixed		0					Ribeiro, L.F., Blackburn, D.C., Stanley, E.L., Pie, M.R., Bornschein, M.R. (2017). Two new species of the Brachycephalus pernix group (Anura: Brachycephalidae) from the state of Paraná, southern Brazil. PeerJ 5: p.e3603.
Rice et al. 2016	0	GE Nanotom			80	180	0		500		preserved/fixed		1	PTA		1		Rice, R., Kallonen, A., Cebra-Thomas, J., Gilbert, S.F. (2016). Development of the turtle plastron, the order-defining skeletal structure. Proc. Natl. Acad. Sci. 113: 5317-5322.
Rieppel 2007	0			63			0				preserved/fixed		0		50	50	1	Rieppel, O. (2007). The naso-frontal joint in snakes as revealed by high-resolution X-ray computed tomography of intact and complete skulls. Zoologischer Anzeiger-A Journal of Comparative Zoology 246: 177-191.
Rieppel et al. 2008	1						0						0		144	144	1	Rieppel, O., Gauthier, J., Maisano, J. (2008). Comparative morphology of the dermal palate in squamate reptiles, with comments on phylogenetic implications. Zool. J. Linn. Soc. 152: 131-152.
Rieppel et al. 2009	1	Bruker Skyscan series		7	40	250	0				preserved/fixed		0		4	4	1	Rieppel, O., Kley, N.J., Maisano, J.A. (2009). Morphology of the skull of the white‐nosed blindsnake, Liotyphlops albirostris (Scolecophidia: Anomalepididae). J. Morph. 270: 536-557.
Rieppel & Maisano 2007	0			5.4	180	88	1	none			preserved/fixed		0		1	1	1	Rieppel, O., Maisano, J.A. (2007). The skull of the rare Malaysian snake Anomochilus leonardi Smith, based on high-resolution X-ray computed tomography. Zool. J. Linn. Soc. 149: 671-685.
Rivera & Stayton 2011	1						0						0		1	1	1	Rivera, G., Stayton, C.T. (2011). Finite element modeling of shell shape in the freshwater turtle Pseudemys concinna reveals a trade‐off between mechanical strength and hydrodynamic efficiency. J. Morph. 272: 1192-1203.
Rivera & Stayton 2013	1						0						0		1	1	1	Rivera, G., Stayton, C.T. (2013). Effects of asymmetry on the strength of the chelonian shell: a comparison of three species. J. Morph. 274: 901-908.
Roček et al. 2015	0	GE Vtomex, Bruker Skyscan series, RX solutions UltraTom, RX solutions EasyTom		13.1625	85.4	117.4	1	0.1 - 1 Al, 1.0 Cu	389			All but one specimen were mounted in glass tubes with the spare space packed out with cotton wool. One sample (Xenopus laevis NMP 6d/2014/1) was fixed in agarose gel to avoid soft tissue vibrations.	0		9	7	1.28571	Roček, Z., Boistel, R., Lenoir, N., Mazurier, A., Pierce, S.E., Rage, J.C., Smirnov, S.V., Schwermann, A.H., Valentin, X., Venczel, M., Wuttke, M. (2015). Frontoparietal bone in extinct Palaeobatrachidae (Anura). its variation and taxonomic value. Anat. Rec. 298: 1848-1863.
Rowe et al. 2000	0						0				skeletal		0					Rowe, T., Brochu, C.A., Colbert, M., Merck, J.W., Kishi, K., Saglamer, E., Warren, S. (1999). Introduction to Alligator: Digital atlas of the skull. J. Vert. Paleontol. 19: 1-8.
Russell et al. 2014	1	Scanco µCT			80	72	0				preserved/fixed		0		2	2	1	Russell, A.P., Hood, H.A., Bauer, A.M. (2014). Laryngotracheal and cervical muscular anatomy in the genus Uroplatus (Gekkota: Gekkonidae) in relation to distress call emission. Afr. J. Herp. 63: 127-151.
Salazar-Valenzuela et al. 2015	0	Bruker Skyscan series			40	533	0				preserved/fixed		0		1	1	1	Salazar-Valenzuela, D., Martins, A., Amador-Oyola, L., Torres-Carvajal, O. (2015). A new species and country record of threadsnakes (Serpentes: Leptotyphlopidae: Epictinae) from northern Ecuador. Amphibian & Reptile Conservation 8: 107-120.
Sánchez-Vialas et al. 2018	0	Nikon XTH series		47	126		0			90	preserved/fixed		0		2	2	1	Sánchez-Vialas, A., Calvo-Revuelta, M., Castroviejo-Fisher, S., De la Riva, I. (2018). The taxonomic status of Petropedetes newtonii (Amphibia, Anura, Petropedetidae). ZooKeys 765: 59.
Sanders et al. 2012	0	Bruker Skyscan series		18	69	134	1	none	295				0		12	12	1	Sanders, K.L., Rasmussen, A.R., Elmberg, J. (2012). Independent innovation in the evolution of paddle-shaped tails in viviparous sea snakes (Elapidae: Hydrophiinae). Integr. Comp. Biol. 52: 311-320.
Sanders et al. 2010	0	Bruker Skyscan series		18	70	134	1	none	295				0		2	1	2	Sanders, K.L., Rasmussen, A.R., Elmberg, J., Mumpuni, S., Guinea, M., Blias, P., Lee, M.S., Fry, B.G. (2012). Aipysurus mosaicus, a new species of egg-eating sea snake (Elapidae: Hydrophiinae), with a re-description of Aipysurus eydouxii (Gray, 1849). Zootaxa 3431: 1-18.
Sanger et al. 2013	0	Nikon XTH series		15	55	170	0		1000		preserved/fixed		0		11	11	1	Sanger, T.J., Sherratt, E., McGlothlin, J.W., Brodie, E.D., Losos, J.B., Abzhanov, A. (2013). Convergent evolution of sexual dimorphism in skull shape using distinct developmental strategies. Evolution 67: 2180-2193.
Sankhyan & Čerňanský 2016	0	GE Vtomex					0				fossil		0		7	6	1.16667	Sankhyan, A.R., Čerňanský, A. (2016). A first possible chameleon from the late Miocene of India (the hominoid site of Haritalyangar). a tentative evidence for an Asian dispersal of chameleons. Sci. Nat. 103: 94.
Scanferla & Bhullar 2014	1						0						0		8	4	2	Scanferla, A., Bhullar, B.A.S. (2014). Postnatal Development of the Skull of Dinilysia patagonica (Squamata‐Stem Serpentes). Anat. Rec. 297: 560-573.
Scanferla et al. 2016	0			12			0				fossil		0		1	1	1	Scanferla, A., Smith, K.T., Schaal, S.F. (2016). Revision of the cranial anatomy and phylogenetic relationships of the Eocene minute boas Messelophis variatus and Messelophis ermannorum (Serpentes, Booidea). Zool. J. Linn. Soc. 176: 182-206.
Scherz et al. 2017	1	GE Nanotom			120	90	0		625	21	preserved/fixed	Specimens were mounted and stabilised using polystyrene and small wooden braces inside polyethylene or polypropylene vessels containing a small amount of 75–80% EtOH to achieve air saturation and prevent desiccation	0		6	4	1.5	Scherz, M.D., Daza, J.D., Köhler, J., Vences, M., Glaw, F. (2017). Off the scale: a new species of fish-scale gecko (Squamata: Gekkonidae: Geckolepis) with exceptionally large scales. PeerJ 5: p.e2955.
Scherz et al. 2016	0	GE Nanotom			140	80	0			20	preserved/fixed	Specimens were mounted on a polystyrene baseplate using wooden struts, and placed inside a polyethylene vessel	0					Scherz, M.D., Glaw, F., Vences, M., Andreone, F., Crottini, A. (2016). Two new species of terrestrial microhylid frogs (Microhylidae: Cophylinae: Rhombophryne) from northeastern Madagascar. Salamandra 52: 91-106.
Scherz et al. 2017	0	GE Nanotom		27	100	100	1	0.1 Cu	625	25	preserved/fixed		0					Scherz, M.D., Hawlitschek, O., Andreone, F., Rakotoarison, A., Vences, M., Glaw, F. (2017). A review of the taxonomy and osteology of the Rhombophryne serratopalpebrosa species group (Anura: Microhylidae) from Madagascar, with comments on the value of volume rendering of micro-CT data to taxonomists. Zootaxa 4273: 301-340.
Scherz et al. 2015	0	GE Nanotom			140	80	0		500	20	preserved/fixed	mounted on a polystyrene board inside a sealed polyethylene vessel, and secured in place using small wooden struts and additional polystyrene. A small volume of 80% ethanol was added to achieve air saturation, preventing desiccation of the specimen. The vessel was mounted on a polyvinylchloride tube, and placed inside the micro-CT scanner	0					Scherz, M.D., Rakotoarison, A., Hawlitschek, O., Vences, M., Glaw, F. (2015). Leaping towards a saltatorial lifestyle? An unusually long-legged new species of Rhombophryne (Anura, Microhylidae) from the Sorata massif in northern Madagascar. Zoosyst. Evol. 91: 105.
Scherz et al. 2014	0	GE Nanotom			130	110	0			23.5	preserved/fixed	were wrapped in ethanol soaked paper to stabilize them inside the plastic vessels	0		0	2		Scherz, M.D., Ruthensteiner, B., Vences, M., Glaw, F. (2014). A new microhylid frog, genus Rhombophryne, from northeastern Madagascar, and a re-description of R. serratopalpebrosa using micro-computed tomography. Zootaxa 3860: 547-560.
Scherz et al. 2015	0	GE Nanotom			135	100	0			24.5	preserved/fixed	placed in closed plastic containers filled with ethanol-saturated air (small amount of ethanol at the bottom of the vessel) and affixed to an oblique polystyrene panel	0					Scherz, M.D., Ruthensteiner, B., Vieites, D.R., Vences, M., Glaw, F. (2015). Two new microhylid frogs of the genus Rhombophryne with superciliary spines from the Tsaratanana Massif in northern Madagascar. Herpetologica 71: 310-321.
Scherz et al. 2016	0	GE Nanotom			105	120	0		625		preserved/fixed		0					Scherz, M.D., Vences, M., Rakotoarison, A., Andreone, F., Köhler, J., Glaw, F., Crottini, A. (2016). Reconciling molecular phylogeny, morphological divergence and classification of Madagascan narrow-mouthed frogs (Amphibia: Microhylidae). Mol. Phylogenet. Evol. 100: 372-381.
Schmidt et al. 2011	0	Zeiss Xradia MicroXCT					0				preserved/fixed		1	PTA	10	1	10	Schmidt, J., Schuff, M., Olsson, L. (2011). A role for FoxN3 in the development of cranial cartilages and muscles in Xenopus laevis (Amphibia: Anura: Pipidae) with special emphasis on the novel rostral cartilages. J. Anat. 218: 226-242.
Sharpe et al. 2013	0						0						0		1	1	1	Sharpe, S.S., Ding, Y., Goldman, D.I. (2013). Environmental interaction influences muscle activation strategy during sand-swimming in the sandfish lizard Scincus scincus. J. Exp. Biol. 216: 260-274.
Sherratt et al. 2015	0	Nikon XTH series		36.55	115	165	0		884.5		amber		0		20			Sherratt, E., del Rosario Castañeda, M., Garwood, R.J., Mahler, D.L., Sanger, T.J., Herrel, A., de Queiroz, K., Losos, J.B. (2015). Amber fossils demonstrate deep-time stability of Caribbean lizard communities. PNAS 112: 9961-9966.
Wilkinson et al. 2011	0						0				preserved/fixed		0		524	114	4.59649	Sherratt, E., Gower, D.J., Klingenberg, C.P., Wilkinson, M. (2014). Evolution of cranial shape in caecilians (Amphibia: Gymnophiona). Evol. Biol. 41: 528-545.
Simões et al. 2018	0			30.255	150	100	1	1-1.5 Al	2500		fossil		0		1	1	1	Simões, T.R., Caldwell, M.W., Tałanda, M., Bernardi, M., Palci, A., Vernygora, O., Bernardini, F., Mancini, L., Nydam, R.L. (2018). The origin of squamates revealed by a Middle Triassic lizard from the Italian Alps. Nature 557: 706.
Simões et al. 2016	0	Bruker Skyscan series		35	100	100	1	0.5 Al	474		skull		0		1	1	1	Simões, T.R., Funston, G.F., Vafaeian, B., Nydam, R.L., Doschak, M.R., Caldwell, M.W. (2016). Reacquisition of the lower temporal bar in sexually dimorphic fossil lizards provides a rare case of convergent evolution. Sci. Rep. 6: 24087.
Skutschas et al. 2018	0	Bruker Skyscan series		2.9	100	100	0				fossil		0		17	1	17	Skutschas, P., Kolchanov, V., Boitsova, E., Kuzmin, I. (2018). Osseous anomalies of the cryptobranchid Eoscapherpeton asiaticum (Amphibia: Caudata) from the Late Cretaceous of Uzbekistan. Mitteilungen aus dem Museum für Naturkunde in Berlin. Fossil Rec. 21: 159.
Skutschas & Gubin 2011	0						0				fossil		0		1	1	1	Skutschas, P.P., Gubin, Y.M. (2012). A new salamander from the late Paleocene—early Eocene of Ukraine. Acta Palaeontol. Pol. 57: 135-148.
Slater et al. 2009	0	GE eXplore Locus		45			0				fresh		0		15	1	15	Slater, B.J., Liu, K.J., Kwan, M.D., Quarto, N., Longaker, M.T. (2009). Cranial osteogenesis and suture morphology in Xenopus laevis: a unique model system for studying craniofacial development. PloS one 4: p.e3914.
Smith & Scanferla 2016	0	Werth Tomoscope, GE Vtomex		35.25	210	180	0						0		2	1	2	Smith, K.T., Scanferla, A. (2016). Fossil snake preserving three trophic levels and evidence for an ontogenetic dietary shift. Palaeobio. Palaeoenv. 96: 589-599.
Souza et al. 2015	0	Siemens Inveon		20.9			0			60	fresh		1	Ba / I	5	1	5	Souza, N.M., Maggs, D.J., Park, S., Puchalski, S.M., Reilly, C.M., Paul‐Murphy, J., Murphy, C.J. (2015). Gross, histologic, and micro‐computed tomographic anatomy of the lacrimal system of snakes. Vet. Ophthalmol. 18: 15-22.
Stanley et al. 2016	0	GE Vtomex		53.575	105	155	0		665.5		preserved/fixed		0		14	2	7	Stanley, E.L., Ceriaco, L.M., Bandeira, S.U.Z.A.N.A., Valerio, H.I.L.A.R.I.A., Bates, M.F., Branch, W.R. (2016). A review of Cordylus machadoi (Squamata: Cordylidae) in southwestern Angola, with the description of a new species from the Pro-Namib desert. Zootaxa 4061: 201-226.
Stayton 2009	1						0						0		1	1	1	Stayton, C.T. (2009). Application of thin‐plate spline transformations to finite element models, or, how to turn a bog turtle into a spotted turtle to analyze both. Evolution 63: 1348-1355.
Stayton 2011	1						0						0		1	1	1	Stayton, C.T. (2011). Biomechanics on the half shell: functional performance influences patterns of morphological variation in the emydid turtle carapace. Zoology 114: 213-223.
Sterli et al. 2010	0				100	100	0		600		fossil		0		1	1	1	Sterli, J., Müller, J., Anquetin, J., Hilger, A. (2010). The parabasisphenoid complex in Mesozoic turtles and the evolution of the testudinate basicranium. Can. J. Earth Sci. 47: 1337-1346.
Sullivan 2010	0	Scanco μCT		36			0				skeletal		0					Sullivan, C. (2010). The role of the calcaneal ‘heel’ as a propulsive lever in basal archosaurs and extant monitor lizards. J. Vert. Paleo. 30: 1422-1432.
Suwannapoom et al. 2018	0	Bruker Skyscan series		3.7		100	0				preserved/fixed	on a polystyrene baseplate and placed inside a hermetically closed polyethylene vessel.	0					Suwannapoom, C., Sumontha, M., Tunprasert, J., Ruangsuwan, T., Pawangkhanant, P., Korost, D.V., Poyarkov, N.A. (2018). A striking new genus and species of cave-dwelling frog (Amphibia: Anura: Microhylidae: Asterophryinae) from Thailand. PeerJ 6: p.e4422.
Talada 2016	1						0						0					Tałanda, M. (2016). Cretaceous roots of the amphisbaenian lizards. Zool. Scripta 45: 1-8.
Teixeira Jr et al. 2012	0						1	none			preserved/fixed		0					Teixeira Jr, M., Dal Vechio, F., Recoder, R.S., Carnaval, A.C., Strangas, M., Damasceno, R.P., Sena, M.D., Rodrigues, M.T. (2012). Two new species of marsupial tree-frogs genus Gastrotheca Fitzinger, 1843 (Anura, Hemiphractidae) from the Brazilian Atlantic Forest. Zootaxa 3437: 1-23.
Tokita et al. 2018	0	Comscan ScanXmate			80	100	0				preserved/fixed		0		11	2	5.5	Tokita, M., Hasegawa, Y., Yano, W., Tsuji, H. (2018). Characterization of the Adaptive Morphology of Japanese Stream Toad (Bufo torrenticola) Using Geometric Morphometrics. Zool. Sci. 35: 99-108.
Triep et al. 2013	0	Scanco µCT20					0				skeletal	placed in a small plastic vessel and stabilized with cotton watting	0					Triep, M., Hess, D., Chaves, H., Brücker, C., Balmert, A., Westhoff, G., Bleckmann, H. (2013). 3D flow in the venom channel of a spitting cobra: do the ridges in the fangs act as fluid guide vanes?. PloS one 8: p.e61548.
Ukuwela et al. 2013	0	Bruker Skyscan series		18			1	none	295				0		2	1	2	Ukuwela, K.D., de Silva, A., Fry, B.G., Lee, M.S., Sanders, K.L. (2013). Molecular evidence that the deadliest sea snake Enhydrina schistosa (Elapidae: Hydrophiinae) consists of two convergent species. Mol. Phylogenet. Evol. 66: 262-269.
Vega & Stayton 2011	1						0						0		1	1	1	Vega, C., Stayton, C.T. (2011). Dimorphism in shell shape and strength in two species of emydid turtle. Herpetologica 67: 397-405.
Vidal-Garcia & Keoch 2017	0	Bruker Skyscan series, Zeiss Xradia MicroXCT		43.4325	58	450	1		2333		preserved/fixed		0		41	21	1.95238	Vidal-García, M., Keogh, J.S. (2017). Phylogenetic conservatism in skulls and evolutionary lability in limbs–morphological evolution across an ancient frog radiation is shaped by diet, locomotion and burrowing. BMC Evol. Biol. 17: 165.
von Byern et al. 2015	0	Zeiss Xradia MicroXCT		2.5			0				preserved/fixed	scanned in water	1	PTA	4	1	4	von Byern, J., Dicke, U., Heiss, E., Grunwald, I., Gorb, S., Staedler, Y., Cyran, N. (2015). Morphological characterization of the glandular system in the salamander Plethodon shermani (Caudata, Plethodontidae). Zool. 118: 334-347.
von May et al. 2018	0	Scanco μCT		11.4	55	145	1	0.5 Al	1000		preserved/fixed	placed in a 34 mm diameter specimen	0		2	2	1	von May, R., Lehr, E., Rabosky, D.L. (2018). Evolutionary radiation of earless frogs in the Andes: molecular phylogenetics and habitat shifts in high-elevation terrestrial breeding frogs. PeerJ 6: p.e4313.
Wake et al. 2012	1						0						0		1	1	1	Wake, D.B., Rovito, S.M., Maisano, J.A., Hanken, J. (2012). Taxonomic status of the enigmatic salamander Cryptotriton adelos (Amphibia: Plethodontidae) from northern Oaxaca, Mexico, with observations on its skull and postcranial skeleton. Zootaxa 3579: 67-70.
Wake & Donnelly 2010	0						1	none			preserved/fixed		0		1	1	1	Wake, M.H., Donnelly, M.A. (2009). A new lungless caecilian (Amphibia: Gymnophiona) from Guyana. Proc. R. Soc. Lond. B. 227: 915-922.
Walmsley et al. 2013	0						0				skeletal		0		5	5	1	Walmsley, C.W., Smits, P.D., Quayle, M.R., McCurry, M.R., Richards, H.S., Oldfield, C.C., Wroe, S., Clausen, P.D., McHenry, C.R. (2013). Why the long face? The mechanics of mandibular symphysis proportions in crocodiles. PLoS one, 8: p.e53873.
Werneburg et al. 2015	0	Sanco μCT		48	70	114	0				preserved/fixed	in bubble wrap, in tube, simultaneous	0		14	1	14	Werneburg, I., Polachowski, K.M., Hutchinson, M.N. (2015). Bony skull development in the Argus monitor (Squamata, Varanidae, Varanus panoptes) with comments on developmental timing and adult anatomy. Zoology 118: 255-280.
Widelitz 2017	0	Scanco MicroCAT			80	250	0			15	live	on bed, held in place with tape	0		9	1	9	Widelitz, R.B., Abdelhamid, A., Khan, M.K., Elkarargy, A., Chuong, C.M., Wu, P. (2017). MicroCT imaging on living alligator teeth reveals natural tooth cycling. In Avian and Reptilian Developmental Biology (pp. 355-362). Humana Press, New York, NY.
Wilkinson et al. 2014	0	Nikon XTH series					0				preserved/fixed		1	I				Wilkinson, M., Kok, P.J., Ahmed, F., Gower, D.J. (2014). Caecilita Wake & Donnelly, 2010 (Amphibia: Gymnophiona) is not lungless: implications for taxonomy and for understanding the evolution of lunglessness. Zootaxa 3779: 383-388.
Wilkinson et al. 2017	0	Nikon XTH series			150	200	0				preserved/fixed		0		3	1	3	Wilkinson, M., Malonza, P.K., Campbell, P., Loader, S.P. (2017). A new species of Boulengerula Tornier, 1896 (Amphibia: Gymnophiona: Herpelidae) from Kenya and the “rediscovery” of Boulengerula denhardti. Zootaxa 4286: 525-534.
Wilkinson et al. 2014	0	Nikon XTH series		11	121.5	145	0		500		preserved/fixed		0					Wilkinson, M., Presswell, B., Sherratt, E., Papadopoulou, A., Gower, D.J. (2014). A new species of striped Ichthyophis Fitzinger, 1826 (Amphibia: Gymnophiona: Ichthyophiidae) from Myanmar. Zootaxa 3785: 45-58.
Sherratt et al. 2014	1						0						0		3	3	1	Wilkinson, M., San Mauro, D., Sherratt, E., Gower, D.J. (2011). A nine-family classification of caecilians (Amphibia: Gymnophiona). Zootaxa 2874: 41-64.
Willaert et al. 2013	0			3.7	80	112	0				preserved/fixed		1	OsO4	1	1	1	Willaert, B., Bossuyt, F., Janssenswillen, S., Adriaens, D., Baggerman, G., Matthijs, S., Pauwels, E., Proost, P., Raepsaet, A., Schoofs, L., Stegen, G. (2013). Frog nuptial pads secrete mating season-specific proteins related to salamander pheromones. J. Exp. Biol. 216: 4139-4143.
Willis et al. 2013	1						0						0					Willis, K.L., Christensen-Dalsgaard, J., Ketten, D.R., Carr, C.E. (2013). Middle ear cavity morphology is consistent with an aquatic origin for testudines. PLoS one 8: p.e54086.
Wu et al. 2013	0	Siemens MicroCAT					0				live		0		9	1	9	Wu, P., Wu, X., Jiang, T.X., Elsey, R.M., Temple, B.L., Divers, S.J., Glenn, T.C., Yuan, K., Chen, M.H., Widelitz, R.B., Chuong, C.M. (2013). Specialized stem cell niche enables repetitive renewal of alligator teeth. PNAS 110: E2009-E2018.
Xing et al. 2018	0	Zeiss Xradia MicroXCT, Bruker Skyscan series	13W	4.49667	62.5	153	1	none			amber + preserved/fixed		0		3	2	1.5	Xing, L., Caldwell, M.W., Chen, R., Nydam, R.L., Palci, A., Simões, T.R., McKellar, R.C., Lee, M.S.Y., Liu, Y., Shi, H., Wang, K., Bai, M. (2018). A mid-Cretaceous embryonic-to-neonate snake in amber from Myanmar. Sci. Adv. 4: eaat5042.
Xing et al. 2018	0	GE Vtomex		9.65	75	150	0		500		fossil + preserved/fixed		0		25	22	1.13636	Xing, L., Stanley, E.L., Bai, M., Blackburn, D.C. (2018). The earliest direct evidence of frogs in wet tropical forests from Cretaceous Burmese amber. Sci. Rep. 8: 8770.
Yi & Norell 2015	1	GE Vtomex		43	145	140	1	none or 0.1 Cu			fossil + preserved/fixed		0		44	44	1	Yi, H., Norell, M.A. (2015). The burrowing origin of modern snakes. Sci. Adv. 1: p.e1500743.
Young et al. 2008	0	Bruker Skyscan series		7			0				skeletal		0		1	1	1	Young, B.A., Boetig, M., Westhoff, G. (2008). Functional bases of the spatial dispersal of venom during cobra “spitting”. Physiol. Biochem. Zool. 82: 80-89.
Young & Kardong 2010	0						0				preserved/fixed	coated lithium carbonate	0		1	1	1	Young, B.A., Kardong, K.V. (2010). The functional morphology of hooding in cobras. J. Exp. Biol. 213: 1521-1528.
Zahradnicek et al. 2008	0						0						0					Zahradnicek, O., Horacek, I., Tucker, A.S. (2008). Viperous fangs: development and evolution of the venom canal. Mech. Develop. 125: 786-796.
